# Supplementary material for: The Structure of Stable Cellulolytic Consortia Isolated from Natural Lignocellulosic Substrates
Source: Int J Mol Sci. 2022 Sep 15;23(18):10779. doi: 10.3390/ijms231810779 (PMC9501375; doi:10.3390/ijms231810779)
Supplement: Supplementary file 1 [file ijms-23-10779-s001.zip › gladkov_supplement_table.xlsx]

## Sheet: Table S1
Table S1. MAGs assembled from the metagenomes of the four cellulolytic consortia
sample_name	Consortium	bioproject_accession	organism	collection_date	env_local_scale	env_medium	geo_loc_name	isolation_source	lat_lon
14_gen_cov.2	OS2	PRJNA844230	Pseudoxanthomonas	2019-09	2 month composting	oat straw	Russia	oat straw	59.737148 N 30.426446 E
14_gen_w_cov.2	OS2	PRJNA844230	Cellulomonas	2019-09	2 month composting	oat straw	Russia	oat straw	59.737148 N 30.426446 E
14_gen_w_cov.19	OS2	PRJNA844230	Luteimonas	2019-09	2 month composting	oat straw	Russia	oat straw	59.737148 N 30.426446 E
26_gen_w_cov.4	OS4	PRJNA844230	Terricaulis	2019-09	2 month composting	oat straw	Russia	oat straw	59.737148 N 30.426446 E
26_gen_w_cov.11	OS4	PRJNA844230	Cellvibrionaceae	2019-09	4 month composting	oat straw	Russia	oat straw	59.737148 N 30.426446 E
26_gen_w_cov.14	OS4	PRJNA844230	Cellulomonas	2019-09	4 month composting	oat straw	Russia	oat straw	59.737148 N 30.426446 E
26_gen_w_cov.15	OS4	PRJNA844230	Opitutus	2019-09	4 month composting	oat straw	Russia	oat straw	59.737148 N 30.426446 E
26_gen_w_cov.16	OS4	PRJNA844230	Chitinophagaceae	2019-09	4 month composting	oat straw	Russia	oat straw	59.737148 N 30.426446 E
29_gen_w_cov.3	PS4	PRJNA844230	Pseudoxanthomonas	2019-09	4 month composting	pine sawdust	Russia	pine sawdust	59.737148 N 30.426446 E
29_gen_w_cov.4	PS4	PRJNA844230	Sporocytophaga	2019-09	4 month composting	pine sawdust	Russia	pine sawdust	59.737148 N 30.426446 E
29_gen_w_cov.10	PS4	PRJNA844230	Asticcacaulis	2019-09	4 month composting	pine sawdust	Russia	pine sawdust	59.737148 N 30.426446 E
29_gen_w_cov.19	PS4	PRJNA844230	Demequina	2019-09	4 month composting	pine sawdust	Russia	pine sawdust	59.737148 N 30.426446 E
29_gen_w_cov.20	PS4	PRJNA844230	Dokdonella	2019-09	4 month composting	pine sawdust	Russia	pine sawdust	59.737148 N 30.426446 E
46_gen_cov.1	BL6	PRJNA844230	Cellulomonas	2019-09	6 month composting	birch leaf litter	Russia	birch leaf litter	59.737148 N 30.426446 E
46_gen_cov.2	BL6	PRJNA844230	Methyloversatilis	2019-09	6 month composting	birch leaf litter	Russia	birch leaf litter	59.737148 N 30.426446 E
46_gen_cov.3	BL6	PRJNA844230	Devosia	2019-09	6 month composting	birch leaf litter	Russia	birch leaf litter	59.737148 N 30.426446 E
46_gen_w_cov.1	BL6	PRJNA844230	Magnetospirillum	2019-09	6 month composting	birch leaf litter	Russia	birch leaf litter	59.737148 N 30.426446 E
46_gen_w_cov.5	BL6	PRJNA844230	Devosia ginsengisoli	2019-09	6 month composting	birch leaf litter	Russia	birch leaf litter	59.737148 N 30.426446 E
46_gen_w_cov.30	BL6	PRJNA844230	Afipia	2019-09	6 month composting	birch leaf litter	Russia	birch leaf litter	59.737148 N 30.426446 E

## Sheet: Table S2
Table S2. Taxonomic distribution of GH genes across the four cellulolytic consortia
Consortium	Phylum	Class	Genus	Species	tax	GH
BL6	Firmicutes	Bacilli	Cohnella	Cohnella sp004801405	318740	179
BL6	Firmicutes	Bacilli	YN15	YN15 sp003285005	262508	83
OS4	Myxococcota	Polyangia	NIC37A-2	NIC37A-2 sp002085155	299664	82
PS4	Bacteroidota	Bacteroidia	Sporocytophaga	Sporocytophaga myxococcoides_A	317427	82
OS2	Bacteroidota	Bacteroidia	Sporocytophaga	Sporocytophaga myxococcoides_A	317427	68
OS2	Verrucomicrobiota	Verrucomicrobiae	Opitutus	Opitutus terrae	281575	62
OS4	Proteobacteria	Alphaproteobacteria	Asticcacaulis	Asticcacaulis tiandongensis	264718	60
BL6	Actinobacteriota	Actinomycetia	Cellulomonas	Cellulomonas gilvus	280640	58
OS4	Verrucomicrobiota	Verrucomicrobiae	Opitutus	Opitutus terrae	281575	53
PS4	Proteobacteria	Alphaproteobacteria	Asticcacaulis	Asticcacaulis taihuensis	297279	53
BL6	Actinobacteriota	Actinomycetia	Propionicimonas	Propionicimonas sp002843035	281726	53
OS4	Actinobacteriota	Actinomycetia	Cellulomonas	Cellulomonas gelida	226202	48
OS2	Actinobacteriota	Actinomycetia	Cellulomonas	Cellulomonas gelida	226202	47
BL6	Proteobacteria	Alphaproteobacteria	Azospirillum	Azospirillum sp003119115	227201	43
OS2	Proteobacteria	Alphaproteobacteria	Shinella	Shinella granuli	233917	34
BL6	Proteobacteria	Gammaproteobacteria	Pseudoxanthomonas_A	Pseudoxanthomonas_A japonensis	230531	34
PS4	Bacteroidota	Bacteroidia	46-32	46-32 sp001898405	250681	32
PS4	Firmicutes	Bacilli	Cohnella	Cohnella sp003001675	248747	32
OS2	Proteobacteria	Gammaproteobacteria	Pseudoxanthomonas	Pseudoxanthomonas jiangsuensis	266572	31
OS2	Proteobacteria	Alphaproteobacteria	Asticcacaulis	Asticcacaulis tiandongensis	264718	29
OS4	Proteobacteria	Alphaproteobacteria	Aquamicrobium_A	Aquamicrobium_A sediminum	292193	29
OS4	Proteobacteria	Gammaproteobacteria	Pseudoxanthomonas_A	Pseudoxanthomonas_A japonensis	230531	29
PS4	Actinobacteriota	Actinomycetia	Demequina	Demequina lutea_A	308082	29
PS4	Proteobacteria	Gammaproteobacteria	Pseudoxanthomonas_A	Pseudoxanthomonas_A japonensis	230531	29
BL6	Proteobacteria	Alphaproteobacteria	Devosia_A	Devosia_A sp001402915	279276	29
OS4	Proteobacteria	Alphaproteobacteria	Shinella	Shinella granuli	233917	28
OS4	Proteobacteria	Gammaproteobacteria	UBA5868	UBA5868 sp002432095	271772	28
BL6	Proteobacteria	Alphaproteobacteria	Shinella	Shinella zoogloeoides_A	267356	27
OS4	Proteobacteria	Alphaproteobacteria	Devosia	Devosia ginsengisoli	313863	26
OS2	Actinobacteriota	Actinomycetia	Streptomyces	NA	150614	24
BL6	Proteobacteria	Gammaproteobacteria	Pseudoxanthomonas_A	Pseudoxanthomonas_A indica	256265	24
OS2	Verrucomicrobiota	Verrucomicrobiae	ER46	ER46 sp011525695	302874	22
OS4	Proteobacteria	Alphaproteobacteria	Devosia	Devosia elaeis	321058	22
OS4	Proteobacteria	Gammaproteobacteria	Achromobacter	Achromobacter veterisilvae	318418	22
PS4	Proteobacteria	Alphaproteobacteria	Agrobacterium	Agrobacterium sp900013535	197092	22
PS4	Proteobacteria	Alphaproteobacteria	Youhaiella	Youhaiella tibetensis	224289	22
BL6	Proteobacteria	Alphaproteobacteria	Devosia	Devosia riboflavina	305111	22
OS2	Proteobacteria	Gammaproteobacteria	Luteimonas	Luteimonas aestuarii	323011	21
OS2	Proteobacteria	Alphaproteobacteria	Devosia	Devosia riboflavina	305111	20
PS4	Actinobacteriota	Actinomycetia	Protaetiibacter	Protaetiibacter sp001898835	322880	20
PS4	Proteobacteria	Alphaproteobacteria	Bosea	Bosea sp002220095	320883	20
BL6	Proteobacteria	Alphaproteobacteria	Devosia	Devosia ginsengisoli	313863	20
OS2	Verrucomicrobiota	Verrucomicrobiae	EW11	EW11 sp003054665	320619	19
OS2	Proteobacteria	Alphaproteobacteria	Bosea	Bosea sp001509835	248921	18
PS4	Actinobacteriota	Actinomycetia	Lysinimonas_A	Lysinimonas_A yzui	321717	17
BL6	Proteobacteria	Alphaproteobacteria	Bosea	Bosea robiniae	210012	17
BL6	Proteobacteria	Gammaproteobacteria	Methyloversatilis	Methyloversatilis discipulorum_A	238860	17
OS2	Myxococcota	Polyangia	NIC37A-2	NIC37A-2 sp002085155	299664	15
OS4	Bacteroidota	Bacteroidia	46-32	46-32 sp001898485	244338	15
OS4	Proteobacteria	Gammaproteobacteria	Luteimonas	Luteimonas sp008244685	264400	15
BL6	Proteobacteria	Gammaproteobacteria	Achromobacter	Achromobacter denitrificans	183264	15
BL6	NA	NA	NA	NA	8034	15
OS2	Proteobacteria	Alphaproteobacteria	Aquamicrobium_A	Aquamicrobium_A sp003577315	309078	14
OS2	Proteobacteria	Gammaproteobacteria	Dokdonella	Dokdonella sp002483055	305825	14
OS4	Proteobacteria	Alphaproteobacteria	Terricaulis	Terricaulis sp003242075	270327	14
OS4	Proteobacteria	Gammaproteobacteria	Luteimonas	Luteimonas marina	266057	14
BL6	Firmicutes	Bacilli	R196	R196 sp004764705	297661	14
OS4	Proteobacteria	Alphaproteobacteria	Bosea	Bosea sp001509835	248921	13
PS4	Actinobacteriota	Actinomycetia	Protaetiibacter	Protaetiibacter sp014483895	289271	13
PS4	Proteobacteria	Alphaproteobacteria	Devosia_A	Devosia_A sp903842455	292864	13
PS4	Proteobacteria	Alphaproteobacteria	Devosia_A	Devosia_A sp001402915	279276	12
PS4	Proteobacteria	Gammaproteobacteria	Dokdonella	Dokdonella sp002483055	305825	12
OS2	Verrucomicrobiota	Verrucomicrobiae	Lacunisphaera	Lacunisphaera lentus	258553	11
OS4	Proteobacteria	Gammaproteobacteria	MR-S7	MR-S7 sp000400995	250147	11
OS2	Proteobacteria	Alphaproteobacteria	Devosia_A	Devosia_A sp903842455	292864	10
OS2	Verrucomicrobiota	Verrucomicrobiae	Lacunisphaera	Lacunisphaera limnophila	314748	10
OS4	Proteobacteria	Gammaproteobacteria	Dokdonella	Dokdonella sp002483055	305825	10
BL6	Proteobacteria	Alphaproteobacteria	Magnetospirillum	Magnetospirillum aberrantis	311932	10
OS2	Proteobacteria	Gammaproteobacteria	Paraburkholderia	Paraburkholderia sp003253405	296673	9
OS2	Proteobacteria	Gammaproteobacteria	NA	NA	101169	9
OS4	Proteobacteria	Alphaproteobacteria	Devosia_A	Devosia_A sp903842455	292864	9
BL6	Firmicutes	Bacilli	Paenibacillus_S	Paenibacillus_S sp900114475	308026	9
BL6	Firmicutes_A	Clostridia	Ruminiclostridium	Ruminiclostridium hungatei	318361	9
BL6	Proteobacteria	Alphaproteobacteria	Afipia	Afipia sp001897905	318139	9
PS4	Actinobacteriota	Actinomycetia	Protaetiibacter	Protaetiibacter intestinalis	298153	8
PS4	Proteobacteria	Alphaproteobacteria	Bradyrhizobium	Bradyrhizobium sp009766005	317660	8
PS4	Proteobacteria	Alphaproteobacteria	Bradyrhizobium	NA	176758	8
BL6	Firmicutes	Bacilli	Paenibacillus_C	Paenibacillus_C agaridevorans	221981	8
BL6	Firmicutes	Bacilli	NA	NA	163774	8
OS2	Verrucomicrobiota	Verrucomicrobiae	Ereboglobus	Ereboglobus sp001650175	310267	7
OS4	Proteobacteria	Alphaproteobacteria	Terricaulis	Terricaulis sp004634425	287226	7
PS4	Actinobacteriota	Actinomycetia	Protaetiibacter	Protaetiibacter sp003243275	321744	7
PS4	Verrucomicrobiota	Verrucomicrobiae	CAITWF01	CAITWF01 sp903840415	221045	7
PS4	Verrucomicrobiota	Verrucomicrobiae	Opi-474	Opi-474 sp903862955	209572	7
BL6	Firmicutes	Bacilli	Paenibacillus_C	Paenibacillus_C sp011947265	313132	7
BL6	Proteobacteria	Alphaproteobacteria	Caulobacter	Caulobacter sp001556515	275643	7
BL6	Proteobacteria	Alphaproteobacteria	Devosia_A	Devosia_A sp001899085	249869	7
OS2	Proteobacteria	Alphaproteobacteria	Devosia	Devosia elaeis	321058	6
OS2	Proteobacteria	Gammaproteobacteria	Hydrogenophaga	Hydrogenophaga palleronii	283225	6
OS2	Proteobacteria	Gammaproteobacteria	Hydrogenophaga	Hydrogenophaga sp009859475	259363	6
OS4	Bacteroidota	Bacteroidia	46-32	46-32 sp001898405	250681	6
OS4	Proteobacteria	Alphaproteobacteria	Devosia_A	NA	214326	6
PS4	Planctomycetota	Planctomycetes	Pirellula_B	Pirellula_B sp001610875	263821	6
PS4	Planctomycetota	Planctomycetes	UBA11363	UBA11363 sp007752135	272109	6
PS4	Proteobacteria	Alphaproteobacteria	Mesorhizobium	Mesorhizobium sp000502875	227179	6
PS4	Verrucomicrobiota	Verrucomicrobiae	Opi-474	Opi-474 sp903881475	190163	6
BL6	Firmicutes	Bacilli	Paenibacillus	NA	163775	6
BL6	Firmicutes_A	Clostridia	Ruminiclostridium	Ruminiclostridium cellobioparum	248852	6
BL6	Firmicutes_A	Clostridia	Ruminiclostridium	Ruminiclostridium termitidis	305244	6
BL6	Proteobacteria	Alphaproteobacteria	Caulobacter	Caulobacter sp002742635	318830	6
OS2	Actinobacteriota	Actinomycetia	Streptomyces	Streptomyces griseus_G	300759	5
OS2	Bacteroidota	Bacteroidia	46-32	46-32 sp001898405	250681	5
OS2	Bacteroidota	Bacteroidia	46-32	46-32 sp003243445	307655	5
OS2	Bacteroidota	Bacteroidia	Muribaculum	Muribaculum intestinale	179723	5
OS2	Bacteroidota	Kapabacteria	UBA7675	UBA7675 sp002483085	319848	5
OS2	Proteobacteria	Alphaproteobacteria	Aquamicrobium_A	Aquamicrobium_A sediminum	292193	5
OS2	Proteobacteria	Alphaproteobacteria	Devosia_A	Devosia_A sp001899065	274327	5
OS2	Proteobacteria	Alphaproteobacteria	Rhizobium	Rhizobium esperanzae_A	273452	5
OS2	Proteobacteria	Gammaproteobacteria	Pandoraea	Pandoraea pulmonicola	249060	5
OS4	Bacteroidota	Bacteroidia	Chitinophaga	Chitinophaga varians	296908	5
OS4	Bacteroidota	Bacteroidia	Terrimonas	Terrimonas ferruginea	223411	5
PS4	Planctomycetota	Planctomycetes	NA	NA	195278	5
PS4	Proteobacteria	Alphaproteobacteria	Sphingomonas	Sphingomonas kyeonggiensis_A	288894	5
PS4	Proteobacteria	Gammaproteobacteria	Variovorax	Variovorax sp900115375	188793	5
PS4	Proteobacteria	Gammaproteobacteria	NA	NA	101169	5
BL6	Firmicutes	Bacilli	Cohnella	Cohnella sp003001675	248747	5
BL6	Proteobacteria	Alphaproteobacteria	Sphingomonas	Sphingomonas sp001557215	246708	5
OS2	Actinobacteriota	Actinomycetia	Streptomyces	Streptomyces sp000424825	299549	4
OS2	Actinobacteriota	Actinomycetia	NA	NA	64370	4
OS2	Proteobacteria	Alphaproteobacteria	NA	NA	116083	4
OS2	Proteobacteria	Alphaproteobacteria	NA	NA	135420	4
OS2	Proteobacteria	Gammaproteobacteria	Burkholderia	Burkholderia humptydooensis	185785	4
OS2	Verrucomicrobiota	Verrucomicrobiae	ER46	NA	225829	4
OS2	NA	NA	NA	NA	8034	4
OS4	Proteobacteria	Alphaproteobacteria	Devosia_A	Devosia_A sp001899085	249869	4
OS4	Proteobacteria	Gammaproteobacteria	Hydrogenophaga	Hydrogenophaga borbori	205459	4
OS4	Proteobacteria	Gammaproteobacteria	Hydrogenophaga	Hydrogenophaga intermedia	207069	4
OS4	Proteobacteria	Gammaproteobacteria	Lysobacter	Lysobacter enzymogenes	246941	4
PS4	Actinobacteriota	Actinomycetia	Arachnia	Arachnia sp013333735	254811	4
PS4	Actinobacteriota	Actinomycetia	Arthrobacter_D	Arthrobacter_D sp000520595	263999	4
PS4	Actinobacteriota	Actinomycetia	Janibacter	Janibacter alkaliphilus	314624	4
PS4	Actinobacteriota	Actinomycetia	Mycobacterium	Mycobacterium lentiflavum	282115	4
PS4	Actinobacteriota	Actinomycetia	Nocardia	Nocardia tenerifensis	244433	4
PS4	Actinobacteriota	Actinomycetia	Streptomyces	Streptomyces sp008042145	320186	4
PS4	Actinobacteriota	Actinomycetia	NA	NA	149397	4
PS4	Proteobacteria	Alphaproteobacteria	Sphingomonas	Sphingomonas sp013416555	289916	4
PS4	Verrucomicrobiota	Verrucomicrobiae	ER46	ER46 sp003054705	310536	4
BL6	Actinobacteriota	Actinomycetia	Protaetiibacter	Protaetiibacter sp014483895	289271	4
BL6	Firmicutes	Bacilli	Paenibacillus	Paenibacillus glucanolyticus	190983	4
BL6	Verrucomicrobiota	Verrucomicrobiae	Lacunisphaera	Lacunisphaera sp900104925	311308	4
OS2	Actinobacteriota	Actinomycetia	Nocardia	Nocardia vermiculata	237860	3
OS2	Actinobacteriota	Actinomycetia	Streptomyces	Streptomyces fulvoviolaceus	295036	3
OS2	Proteobacteria	Alphaproteobacteria	Devosia	Devosia sp001427875	324020	3
OS2	Proteobacteria	Gammaproteobacteria	Paraburkholderia	Paraburkholderia sp004353915	286394	3
OS2	Verrucomicrobiota	Verrucomicrobiae	ER46	ER46 sp005792355	249714	3
OS2	Verrucomicrobiota	Verrucomicrobiae	ER46	ER46 sp903926425	294308	3
OS2	Verrucomicrobiota	Verrucomicrobiae	Opi-474	Opi-474 sp903859715	196155	3
OS2	Verrucomicrobiota	Verrucomicrobiae	Terrimicrobium	Terrimicrobium sp001897195	324213	3
OS2	Verrucomicrobiota	Verrucomicrobiae	Terrimicrobium	Terrimicrobium sp003054655	265307	3
OS4	Bacteroidota	Bacteroidia	46-32	NA	244336	3
OS4	Bacteroidota	Bacteroidia	fimbriimonas	Flavobacterium sediminis	311478	3
OS4	Proteobacteria	Alphaproteobacteria	Asticcacaulis	Asticcacaulis benevestitus	234668	3
OS4	Proteobacteria	Alphaproteobacteria	Asticcacaulis	Asticcacaulis sp000495855	313745	3
OS4	Proteobacteria	Alphaproteobacteria	Asticcacaulis	NA	234665	3
OS4	Proteobacteria	Alphaproteobacteria	Devosia_A	Devosia_A sp001899075	258946	3
OS4	Proteobacteria	Gammaproteobacteria	Hydrogenophaga	Hydrogenophaga sp011772445	190775	3
PS4	Actinobacteriota	Actinomycetia	Cellulomonas	Cellulomonas gelida	226202	3
PS4	Actinobacteriota	Actinomycetia	Microbacterium	NA	179759	3
PS4	Actinobacteriota	Actinomycetia	NA	NA	64372	3
PS4	Planctomycetota	Planctomycetes	NA	NA	202165	3
PS4	Proteobacteria	Alphaproteobacteria	Bradyrhizobium	Bradyrhizobium guangxiense	271377	3
PS4	Proteobacteria	Alphaproteobacteria	Devosia_A	Devosia_A sp001425235	236821	3
PS4	Proteobacteria	Alphaproteobacteria	Devosia_A	Devosia_A sp001899085	249869	3
PS4	Proteobacteria	Alphaproteobacteria	Ga0077548	Ga0077548 sp001464215	265267	3
PS4	Proteobacteria	Alphaproteobacteria	RCIZ01	RCIZ01 sp003666685	323230	3
PS4	Proteobacteria	Alphaproteobacteria	Sphingomonas	Sphingomonas taxi	248472	3
PS4	Verrucomicrobiota	Verrucomicrobiae	Opi-474	Opi-474 sp903872505	220218	3
BL6	Actinobacteriota	Actinomycetia	Cellulomonas	Cellulomonas hominis_B	288926	3
BL6	Firmicutes	Bacilli	Cohnella	Cohnella lubricantis	307792	3
BL6	Firmicutes	Bacilli	Cohnella	Cohnella sp900169535	238540	3
BL6	Firmicutes	Bacilli	Paenibacillus_Z	Paenibacillus_Z nasutitermitis	271933	3
BL6	Firmicutes_A	Clostridia	Lachnoclostridium	Lachnoclostridium sp003526525	282325	3
BL6	Firmicutes_A	Clostridia	Ruminiclostridium	Ruminiclostridium sufflavum	269197	3
BL6	Firmicutes_B	Desulfotomaculia	Sporotomaculum	Sporotomaculum syntrophicum	313908	3
BL6	Proteobacteria	Alphaproteobacteria	Devosia_A	Devosia_A sp903842455	292864	3
BL6	Proteobacteria	Alphaproteobacteria	Rhizobium	NA	142396	3
BL6	Proteobacteria	Gammaproteobacteria	Pseudoxanthomonas_A	Pseudoxanthomonas_A mexicana	212133	3
BL6	Verrucomicrobiota	Verrucomicrobiae	Lacunisphaera	Lacunisphaera sp001464505	269525	3
OS2	Actinobacteriota	Actinomycetia	Micromonospora	Micromonospora sp004307965	234581	2
OS2	Armatimonadota	Fimbriimonadia	Fimbriimonas	NA	193060	2
OS2	Bacteroidota	Bacteroidia	46-32	46-32 sp001898485	244338	2
OS2	Chlamydiota	Chlamydiia	Protochlamydia	Protochlamydia naegleriophila	246815	2
OS2	Myxococcota	Polyangia	Labilithrix	Labilithrix sp009781005	298215	2
OS2	Myxococcota	Polyangia	Polyangium	Polyangium sp005144635	268756	2
OS2	Proteobacteria	Alphaproteobacteria	Bosea	Bosea sp011764485	287396	2
OS2	Proteobacteria	Gammaproteobacteria	Acidovorax	Acidovorax facilis	237749	2
OS2	Proteobacteria	Gammaproteobacteria	Halomonas_C	Halomonas_C sp010993675	287855	2
OS2	Proteobacteria	Gammaproteobacteria	Limnohabitans_A	Limnohabitans_A sp003063645	317329	2
OS2	Proteobacteria	Gammaproteobacteria	MR-S7	MR-S7 sp000400995	250147	2
OS2	Proteobacteria	Gammaproteobacteria	Noviherbaspirillum	Noviherbaspirillum sp003590875	275016	2
OS2	Proteobacteria	Gammaproteobacteria	NA	NA	71059	2
OS2	Verrucomicrobiota	Verrucomicrobiae	Nibricoccus	Nibricoccus aquaticus	292165	2
OS2	Verrucomicrobiota	Verrucomicrobiae	Opi-474	Opi-474 sp903855985	257148	2
OS2	Verrucomicrobiota	Verrucomicrobiae	UBA6669	UBA6669 sp014584295	322402	2
OS4	Bacteroidota	Bacteroidia	Chitinophaga	Chitinophaga cymbidii	275815	2
OS4	Bacteroidota	Bacteroidia	JJ008	JJ008 sp902826165	289475	2
OS4	Bacteroidota	Bacteroidia	NA	NA	178791	2
OS4	Proteobacteria	Alphaproteobacteria	Asticcacaulis	Asticcacaulis endophyticus	262136	2
OS4	Proteobacteria	Alphaproteobacteria	Asticcacaulis	Asticcacaulis sp000495835	314021	2
OS4	Proteobacteria	Alphaproteobacteria	Devosia	Devosia sp005222805	286001	2
OS4	Proteobacteria	Alphaproteobacteria	Devosia_A	Devosia_A insulae	259861	2
OS4	Proteobacteria	Alphaproteobacteria	NA	NA	116083	2
OS4	Proteobacteria	Gammaproteobacteria	Luteimonas	Luteimonas sp001683895	322508	2
OS4	Proteobacteria	Gammaproteobacteria	Luteimonas	Luteimonas yindakuii	251646	2
OS4	Proteobacteria	Gammaproteobacteria	UBA5868	UBA5868 sp014336955	294394	2
PS4	Actinobacteriota	Actinomycetia	Mycobacterium	NA	64373	2
PS4	Actinobacteriota	Actinomycetia	Protaetiibacter	Protaetiibacter sp004216815	300153	2
PS4	Actinobacteriota	Actinomycetia	SCUT-3	SCUT-3 sp014083985	272192	2
PS4	Actinobacteriota	Actinomycetia	NA	NA	64370	2
PS4	Actinobacteriota	Actinomycetia	NA	NA	130506	2
PS4	Myxococcota	UBA9042	CAIYBN01	CAIYBN01 sp903869075	280331	2
PS4	Planctomycetota	Planctomycetes	Planctopirus	Planctopirus sp013822855	291828	2
PS4	Planctomycetota	Planctomycetes	Rhodopirellula	Rhodopirellula sp007860105	309941	2
PS4	Proteobacteria	Alphaproteobacteria	Bradyrhizobium	Bradyrhizobium erythrophlei_B	307839	2
PS4	Proteobacteria	Alphaproteobacteria	Bradyrhizobium	Bradyrhizobium lablabi_B	290780	2
PS4	Proteobacteria	Alphaproteobacteria	Bradyrhizobium	Bradyrhizobium sp004799405	289768	2
PS4	Proteobacteria	Alphaproteobacteria	Bradyrhizobium	Bradyrhizobium sp900103365	274203	2
PS4	Proteobacteria	Alphaproteobacteria	Devosia	Devosia limi	231767	2
PS4	Proteobacteria	Alphaproteobacteria	Devosia_A	Devosia_A insulae	259861	2
PS4	Proteobacteria	Alphaproteobacteria	Mesorhizobium	Mesorhizobium sp003952385	198559	2
PS4	Proteobacteria	Alphaproteobacteria	Mesorhizobium	Mesorhizobium terrae	192481	2
PS4	Proteobacteria	Alphaproteobacteria	Mesorhizobium	NA	156359	2
PS4	Proteobacteria	Alphaproteobacteria	Sphingomonas	Sphingomonas insulae	246963	2
PS4	Proteobacteria	Alphaproteobacteria	Sphingomonas	Sphingomonas kyeonggiensis	286583	2
PS4	Proteobacteria	Alphaproteobacteria	Sphingomonas	Sphingomonas sp903884945	276772	2
PS4	Verrucomicrobiota	Verrucomicrobiae	CAITWF01	CAITWF01 sp903896015	193527	2
PS4	Verrucomicrobiota	Verrucomicrobiae	ER46	ER46 sp903848965	316240	2
PS4	Verrucomicrobiota	Verrucomicrobiae	Fen-1467	Fen-1467 sp003142955	230998	2
PS4	Verrucomicrobiota	Verrucomicrobiae	Opi-474	Opi-474 sp903855985	257148	2
PS4	Verrucomicrobiota	Verrucomicrobiae	Opitutus	Opitutus terrae	281575	2
PS4	Verrucomicrobiota	Verrucomicrobiae	NA	NA	161558	2
PS4	NA	NA	NA	NA	8034	2
BL6	Actinobacteriota	Actinomycetia	Cellulomonas	Cellulomonas hominis	225099	2
BL6	Actinobacteriota	Actinomycetia	Microterricola	Microterricola sp003610585	309032	2
BL6	Firmicutes	Bacilli	Paenibacillus	Paenibacillus durus	279765	2
BL6	Firmicutes	Bacilli	Paenibacillus_A	Paenibacillus_A fonticola	266644	2
BL6	Firmicutes	Bacilli	Paenibacillus_AA	Paenibacillus_AA koleovorans	309472	2
BL6	Firmicutes	Bacilli	Paenibacillus_E	Paenibacillus_E sp001428045	282276	2
BL6	Firmicutes	Bacilli	Paenibacillus_G	Paenibacillus_G mucilaginosus	223868	2
BL6	Firmicutes	Bacilli	Paenibacillus_O	Paenibacillus_O pasadenensis	217138	2
BL6	Firmicutes_A	Clostridia	Ruminiclostridium	NA	248850	2
BL6	Planctomycetota	Planctomycetes	Gemmata	Gemmata sp901538445	288213	2
BL6	Proteobacteria	Alphaproteobacteria	Afipia	Afipia clevelandensis	253761	2
BL6	Proteobacteria	Alphaproteobacteria	Afipia	Afipia massiliensis	267845	2
BL6	Proteobacteria	Alphaproteobacteria	Caulobacter	Caulobacter sp903900155	221411	2
BL6	Proteobacteria	Alphaproteobacteria	Devosia_A	Devosia_A insulae	259861	2
BL6	Proteobacteria	Alphaproteobacteria	Sphingomonas	Sphingomonas sp002280565	242032	2
BL6	Proteobacteria	Alphaproteobacteria	Terricaulis	Terricaulis sp011332235	285600	2
BL6	Proteobacteria	Alphaproteobacteria	Terricaulis	Terricaulis sp902826245	295959	2
BL6	Proteobacteria	Alphaproteobacteria	NA	NA	135420	2
BL6	Proteobacteria	Gammaproteobacteria	Klebsiella	Klebsiella quasipneumoniae	125100	2
BL6	Verrucomicrobiota	Verrucomicrobiae	ER46	ER46 sp005792355	249714	2
BL6	Verrucomicrobiota	Verrucomicrobiae	Lacunisphaera	Lacunisphaera lentus	258553	2
BL6	Verrucomicrobiota	Verrucomicrobiae	Lacunisphaera	Lacunisphaera sp903898675	206196	2
OS2	Actinobacteriota	Actinomycetia	Propionicimonas	Propionicimonas sp002843035	281726	1
OS2	Actinobacteriota	Actinomycetia	Streptomyces	Streptomyces hundungensis	268361	1
OS2	Actinobacteriota	Actinomycetia	Tomitella	Tomitella sp014126825	243946	1
OS2	Armatimonadota	Fimbriimonadia	Fimbriimonas	Fimbriimonas ginsengisoli	284562	1
OS2	Bacteroidota	Bacteroidia	Aquimarina	Aquimarina latercula	221236	1
OS2	Bacteroidota	Bacteroidia	Pontibacter	Pontibacter pudoricolor	306471	1
OS2	Bacteroidota	Ignavibacteria	JAADIR01	JAADIR01 sp013151245	257802	1
OS2	Bdellovibrionota	Bacteriovoracia	Halobacteriovorax	Halobacteriovorax marinus	255591	1
OS2	Myxococcota	Polyangia	PMG-095	PMG-095 sp004193285	286333	1
OS2	Proteobacteria	Alphaproteobacteria	Aestuariivirga	Aestuariivirga sp012032065	305117	1
OS2	Proteobacteria	Alphaproteobacteria	Allorhizobium	Allorhizobium sp002796995	226368	1
OS2	Proteobacteria	Alphaproteobacteria	Bauldia	Bauldia litoralis	306931	1
OS2	Proteobacteria	Alphaproteobacteria	Devosia	Devosia lucknowensis	307953	1
OS2	Proteobacteria	Alphaproteobacteria	Devosia	Devosia sp001899045	212416	1
OS2	Proteobacteria	Alphaproteobacteria	Devosia_A	Devosia_A sp001425235	236821	1
OS2	Proteobacteria	Alphaproteobacteria	Sphingomonas	Sphingomonas sp902826325	233255	1
OS2	Proteobacteria	Gammaproteobacteria	Acidovorax	Acidovorax sp005405905	263823	1
OS2	Proteobacteria	Gammaproteobacteria	Acidovorax	Acidovorax sp006715665	320014	1
OS2	Proteobacteria	Gammaproteobacteria	Ralstonia	Ralstonia pickettii	162443	1
OS2	Verrucomicrobiota	Verrucomicrobiae	CAIOZY01	CAIOZY01 sp903834135	161604	1
OS2	Verrucomicrobiota	Verrucomicrobiae	ER46	ER46 sp903820035	225832	1
OS2	Verrucomicrobiota	Verrucomicrobiae	Opi-474	Opi-474 sp903825285	184140	1
OS2	Verrucomicrobiota	Verrucomicrobiae	Opi-474	Opi-474 sp903881475	190163	1
OS2	Verrucomicrobiota	Verrucomicrobiae	Terrimicrobium	NA	265305	1
OS2	Verrucomicrobiota	Verrucomicrobiae	Tous-C4FEB	Tous-C4FEB sp014376585	271648	1
OS2	Verrucomicrobiota	Verrucomicrobiae	UBA1321	UBA1321 sp002306945	287719	1
OS2	Verrucomicrobiota	Verrucomicrobiae	NA	NA	161558	1
OS2	Verrucomicrobiota	Verrucomicrobiae	NA	NA	197498	1
OS4	Bacteroidota	Bacteroidia	Deminuibacter	Deminuibacter soli	283769	1
OS4	Bacteroidota	Bacteroidia	Flavobacterium	Flavobacterium lutivivi	321260	1
OS4	Bacteroidota	Bacteroidia	JJ008	JJ008 sp002400415	322858	1
OS4	Bacteroidota	Bacteroidia	Pedobacter	Pedobacter sp004331695	321249	1
OS4	Bacteroidota	Bacteroidia	VBAS01	VBAS01 sp005882315	323443	1
OS4	Proteobacteria	Alphaproteobacteria	Aquamicrobium_A	Aquamicrobium_A sp003577315	309078	1
OS4	Proteobacteria	Alphaproteobacteria	Asticcacaulis	Asticcacaulis biprosthecium	292485	1
OS4	Proteobacteria	Alphaproteobacteria	Asticcacaulis	Asticcacaulis excentricus_A	324157	1
OS4	Proteobacteria	Alphaproteobacteria	Asticcacaulis	Asticcacaulis sp000495815	308826	1
OS4	Proteobacteria	Alphaproteobacteria	Devosia	Devosia limi	231767	1
OS4	Proteobacteria	Alphaproteobacteria	Devosia_A	Devosia_A sp001425235	236821	1
OS4	Proteobacteria	Alphaproteobacteria	Rhizobium	Rhizobium sp000746385	251003	1
OS4	Proteobacteria	Alphaproteobacteria	Shinella	Shinella kummerowiae	292321	1
OS4	Proteobacteria	Alphaproteobacteria	Sphingobium	Sphingobium ummariense	272287	1
OS4	Proteobacteria	Alphaproteobacteria	Xanthobacter	Xanthobacter sp000702385	254539	1
OS4	Proteobacteria	Gammaproteobacteria	Luteimonas	Luteimonas aestuarii	323011	1
OS4	Proteobacteria	Gammaproteobacteria	Luteimonas	Luteimonas padinae	259908	1
OS4	Proteobacteria	Gammaproteobacteria	Luteimonas	Luteimonas sp000472505	231815	1
OS4	Proteobacteria	Gammaproteobacteria	Luteimonas	Luteimonas sp007859305	237347	1
OS4	Proteobacteria	Gammaproteobacteria	Luteimonas	NA	223430	1
OS4	Proteobacteria	Gammaproteobacteria	UBA5868	NA	266531	1
PS4	Actinobacteriota	Actinomycetia	Arthrobacter_D	Arthrobacter_D sp013116745	254701	1
PS4	Actinobacteriota	Actinomycetia	Herbiconiux	Herbiconiux flava	256834	1
PS4	Actinobacteriota	Actinomycetia	Microbacterium	Microbacterium timonense	264310	1
PS4	Actinobacteriota	Actinomycetia	Micromonospora	Micromonospora chersina	254476	1
PS4	Actinobacteriota	Actinomycetia	Mycobacterium	Mycobacterium branderi	241097	1
PS4	Actinobacteriota	Actinomycetia	Mycobacterium	Mycobacterium rhodesiae_A	309570	1
PS4	Actinobacteriota	Actinomycetia	Mycobacterium	Mycobacterium sp900240975	211707	1
PS4	Actinobacteriota	Actinomycetia	Nocardia	Nocardia uniformis	246407	1
PS4	Actinobacteriota	Actinomycetia	Pseudoclavibacter	Pseudoclavibacter sp002931555	241798	1
PS4	Actinobacteriota	Actinomycetia	Streptomyces	Streptomyces sp001507435	231538	1
PS4	Actinobacteriota	Actinomycetia	NA	NA	64371	1
PS4	Actinobacteriota	Actinomycetia	NA	NA	158535	1
PS4	Actinobacteriota	Actinomycetia	NA	NA	190102	1
PS4	Bacteroidota	Bacteroidia	Hymenobacter	Hymenobacter terrenus	277907	1
PS4	Bacteroidota	Bacteroidia	Pedobacter	Pedobacter nanyangensis	265896	1
PS4	Planctomycetota	Planctomycetes	Pirellula_B	Pirellula_B sp903892365	273146	1
PS4	Planctomycetota	Planctomycetes	Rhodopirellula_A	Rhodopirellula_A maiorica	282667	1
PS4	Planctomycetota	Planctomycetes	Roseimaritima	Roseimaritima ulvae	249236	1
PS4	Proteobacteria	Alphaproteobacteria	Allosphingosinicella	Allosphingosinicella ginsenosidimutans	317763	1
PS4	Proteobacteria	Alphaproteobacteria	Bradyrhizobium	Bradyrhizobium arachidis	214726	1
PS4	Proteobacteria	Alphaproteobacteria	Bradyrhizobium	Bradyrhizobium erythrophlei_C	297157	1
PS4	Proteobacteria	Alphaproteobacteria	Bradyrhizobium	Bradyrhizobium icense	258134	1
PS4	Proteobacteria	Alphaproteobacteria	Bradyrhizobium	Bradyrhizobium nanningense	222453	1
PS4	Proteobacteria	Alphaproteobacteria	Bradyrhizobium	Bradyrhizobium ottawaense_A	225414	1
PS4	Proteobacteria	Alphaproteobacteria	Devosia	Devosia sp001899045	212416	1
PS4	Proteobacteria	Alphaproteobacteria	Mesorhizobium	Mesorhizobium composti	252668	1
PS4	Proteobacteria	Alphaproteobacteria	Mesorhizobium	Mesorhizobium sp001427025	237064	1
PS4	Proteobacteria	Alphaproteobacteria	Mesorhizobium	Mesorhizobium sp004020545	191665	1
PS4	Proteobacteria	Alphaproteobacteria	Mesorhizobium	Mesorhizobium sp004791025	176736	1
PS4	Proteobacteria	Alphaproteobacteria	Nitrobacter	Nitrobacter hamburgensis	269394	1
PS4	Proteobacteria	Alphaproteobacteria	Rhizobium	Rhizobium sp900470805	268064	1
PS4	Proteobacteria	Alphaproteobacteria	Rhodoblastus	Rhodoblastus sphagnicola	251880	1
PS4	Proteobacteria	Alphaproteobacteria	Sphingobium	Sphingobium yanoikuyae	167536	1
PS4	Proteobacteria	Alphaproteobacteria	Youhaiella	Youhaiella sp000689495	227154	1
PS4	Proteobacteria	Gammaproteobacteria	Rubrivivax	Rubrivivax sp001464055	277911	1
PS4	Proteobacteria	Gammaproteobacteria	NA	NA	93813	1
PS4	Proteobacteria	Gammaproteobacteria	NA	NA	128774	1
PS4	Verrucomicrobiota	Verrucomicrobiae	CAITWF01	CAITWF01 sp009695305	284091	1
PS4	Verrucomicrobiota	Verrucomicrobiae	CAITWF01	CAITWF01 sp903948415	319290	1
PS4	Verrucomicrobiota	Verrucomicrobiae	ER46	ER46 sp005792355	249714	1
PS4	Verrucomicrobiota	Verrucomicrobiae	Geminisphaera	Geminisphaera sp000242935	243461	1
PS4	Verrucomicrobiota	Verrucomicrobiae	Lacunisphaera	Lacunisphaera lentus	258553	1
PS4	Verrucomicrobiota	Verrucomicrobiae	Opi-474	Opi-474 sp903839035	193326	1
PS4	Verrucomicrobiota	Verrucomicrobiae	Opi-474	Opi-474 sp903859715	196155	1
PS4	Verrucomicrobiota	Verrucomicrobiae	Opi-474	NA	170384	1
PS4	Verrucomicrobiota	Verrucomicrobiae	Opitutus	Opitutus sp903877135	212601	1
PS4	Verrucomicrobiota	Verrucomicrobiae	Rariglobus	Rariglobus hedericola	282173	1
PS4	Verrucomicrobiota	Verrucomicrobiae	Tous-C4FEB	Tous-C4FEB sp009919985	308911	1
BL6	Actinobacteriota	Actinomycetia	Protaetiibacter	Protaetiibacter sp001898835	322880	1
BL6	Actinobacteriota	Actinomycetia	Protaetiibacter	Protaetiibacter sp003243275	321744	1
BL6	Actinobacteriota	Actinomycetia	NA	NA	64370	1
BL6	Bacteroidota	Bacteroidia	Dyadobacter	Dyadobacter jiangsuensis	274636	1
BL6	Bacteroidota	Bacteroidia	Edaphocola	Edaphocola sp001897155	273910	1
BL6	Firmicutes	Bacilli	Cohnella	Cohnella luojiensis	277842	1
BL6	Firmicutes	Bacilli	Cohnella	Cohnella nanjingensis	264724	1
BL6	Firmicutes	Bacilli	Cohnella	Cohnella panacarvi	265295	1
BL6	Firmicutes	Bacilli	Mycoplasmopsis	Mycoplasmopsis mucosicanis	299872	1
BL6	Firmicutes	Bacilli	Paenibacillus	Paenibacillus brasilensis	244055	1
BL6	Firmicutes	Bacilli	Paenibacillus	Paenibacillus durus_B	246433	1
BL6	Firmicutes	Bacilli	Paenibacillus	Paenibacillus peoriae	279970	1
BL6	Firmicutes	Bacilli	Paenibacillus_AF	Paenibacillus_AF thalictri	284440	1
BL6	Firmicutes	Bacilli	Paenibacillus_C	Paenibacillus_C castaneae	246883	1
BL6	Firmicutes	Bacilli	Paenibacillus_C	NA	221977	1
BL6	Firmicutes	Bacilli	Paenibacillus_G	Paenibacillus_G naphthalenovorans	208436	1
BL6	Firmicutes	Bacilli	Paenibacillus_G	Paenibacillus_G validus	206284	1
BL6	Firmicutes	Bacilli	Paenibacillus_S	Paenibacillus_S sp001956045	270341	1
BL6	Firmicutes	Bacilli	Paenibacillus_Z	Paenibacillus_Z sp900116125	321841	1
BL6	Firmicutes	Bacilli	NA	NA	22785	1
BL6	Firmicutes_A	Clostridia	Anaerocolumna	Anaerocolumna sp002294045	297642	1
BL6	Firmicutes_A	Clostridia	Ruminiclostridium	Ruminiclostridium cellulolyticum	262021	1
BL6	Firmicutes_A	Clostridia	Ruminiclostridium	Ruminiclostridium papyrosolvens_A	302469	1
BL6	Firmicutes_A	Clostridia	Thermoclostridium_A	Thermoclostridium_A caenicola	264422	1
BL6	Firmicutes_A	NA	NA	NA	89676	1
BL6	Proteobacteria	Alphaproteobacteria	Caulobacter	Caulobacter segnis	249241	1
BL6	Proteobacteria	Alphaproteobacteria	Caulobacter	Caulobacter segnis_A	320434	1
BL6	Proteobacteria	Alphaproteobacteria	Caulobacter	Caulobacter sp000712075	270085	1
BL6	Proteobacteria	Alphaproteobacteria	Caulobacter	NA	200684	1
BL6	Proteobacteria	Alphaproteobacteria	Devosia_A	Devosia_A sp001425235	236821	1
BL6	Proteobacteria	Alphaproteobacteria	Devosia_A	Devosia_A sp004144345	270861	1
BL6	Proteobacteria	Alphaproteobacteria	Magnetospirillum	Magnetospirillum sp006218045	254280	1
BL6	Proteobacteria	Alphaproteobacteria	Mesorhizobium	Mesorhizobium helmanticense	241801	1
BL6	Proteobacteria	Alphaproteobacteria	Mycoplana	Mycoplana subbaraonis	310686	1
BL6	Proteobacteria	Alphaproteobacteria	Sphingomonas	Sphingomonas guangdongensis	322975	1
BL6	Proteobacteria	Alphaproteobacteria	ZC4RG25	ZC4RG25 sp002919265	233552	1
BL6	Proteobacteria	Alphaproteobacteria	NA	NA	176757	1
BL6	Verrucomicrobiota	Verrucomicrobiae	Didemnitutus	Didemnitutus sp013821985	298321	1
BL6	Verrucomicrobiota	Verrucomicrobiae	Lacunisphaera	Lacunisphaera limnophila	314748	1
BL6	Verrucomicrobiota	Verrucomicrobiae	Lacunisphaera	NA	187687	1
BL6	Verrucomicrobiota	Verrucomicrobiae	Nibricoccus	Nibricoccus aquaticus	292165	1
BL6	Verrucomicrobiota	Verrucomicrobiae	Tous-C4FEB	Tous-C4FEB sp903938935	199855	1
BL6	Verrucomicrobiota	Verrucomicrobiae	NA	NA	161558	1

## Sheet: Table S3
Table S2. Taxonomic distribution of CGCs across the four cellulolytic consortia
Consortium	Phylum	Class	Genus	CGC
OS4	Proteobacteria	Alphaproteobacteria	Devosia	3674
PS4	NA	NA	NA	2807
OS4	Proteobacteria	Gammaproteobacteria	Luteimonas	2535
BL6	Firmicutes	Bacilli	Cohnella	2433
OS4	NA	NA	NA	2235
OS2	Proteobacteria	Alphaproteobacteria	Aquamicrobium_A	2104
BL6	Proteobacteria	Alphaproteobacteria	Devosia_A	2066
PS4	Proteobacteria	Alphaproteobacteria	Devosia_A	1617
OS2	Proteobacteria	Alphaproteobacteria	Bosea	1610
OS2	Proteobacteria	Alphaproteobacteria	Devosia	1305
OS2	Bacteroidota	Bacteroidia	Sporocytophaga	1230
BL6	Proteobacteria	Gammaproteobacteria	Achromobacter	1230
PS4	Proteobacteria	Alphaproteobacteria	Bradyrhizobium	1131
OS4	Proteobacteria	Alphaproteobacteria	Bosea	1101
BL6	Firmicutes	Bacilli	YN15	1074
BL6	Proteobacteria	Alphaproteobacteria	Devosia	1065
BL6	NA	NA	NA	1058
BL6	Proteobacteria	Gammaproteobacteria	Pseudoxanthomonas_A	1035
PS4	Bacteroidota	Bacteroidia	46-32	1026
PS4	Proteobacteria	Alphaproteobacteria	Agrobacterium	1024
OS4	Proteobacteria	Alphaproteobacteria	Devosia_A	1014
PS4	Firmicutes	Bacilli	Cohnella	972
BL6	Proteobacteria	Alphaproteobacteria	Azospirillum	954
OS2	NA	NA	NA	938
OS4	Proteobacteria	Gammaproteobacteria	Dokdonella	918
OS4	Proteobacteria	Alphaproteobacteria	Asticcacaulis	915
PS4	Proteobacteria	Alphaproteobacteria	Sphingomonas	912
OS2	Proteobacteria	Gammaproteobacteria	Acidovorax	910
OS2	Proteobacteria	Alphaproteobacteria	Shinella	884
PS4	Proteobacteria	Alphaproteobacteria	Mesorhizobium	870
OS4	Proteobacteria	Alphaproteobacteria	Aquamicrobium_A	860
OS4	Proteobacteria	Alphaproteobacteria	Shinella	851
PS4	Proteobacteria	Alphaproteobacteria	Youhaiella	845
BL6	Proteobacteria	Alphaproteobacteria	Shinella	834
OS4	Proteobacteria	Gammaproteobacteria	Hydrogenophaga	784
OS2	Proteobacteria	Alphaproteobacteria	Asticcacaulis	770
BL6	Proteobacteria	Alphaproteobacteria	Magnetospirillum	749
OS4	Proteobacteria	Gammaproteobacteria	Pseudoxanthomonas_A	738
OS2	Verrucomicrobiota	Verrucomicrobiae	Opitutus	726
BL6	Proteobacteria	Alphaproteobacteria	Bosea	698
BL6	Firmicutes_A	Clostridia	Ruminiclostridium	690
PS4	Proteobacteria	Alphaproteobacteria	Bosea	685
OS2	Proteobacteria	Alphaproteobacteria	Devosia_A	676
PS4	Actinobacteriota	Actinomycetia	Lysinimonas_A	654
OS2	Actinobacteriota	Actinomycetia	Cellulomonas	645
BL6	Proteobacteria	Alphaproteobacteria	Caulobacter	592
PS4	Actinobacteriota	Actinomycetia	Protaetiibacter	585
OS2	Proteobacteria	Alphaproteobacteria	NA	516
BL6	Proteobacteria	Alphaproteobacteria	Sphingomonas	495
PS4	Proteobacteria	Alphaproteobacteria	Asticcacaulis	490
PS4	Proteobacteria	Gammaproteobacteria	Pseudoxanthomonas_A	484
OS4	Proteobacteria	Gammaproteobacteria	MR-S7	465
OS2	Proteobacteria	Alphaproteobacteria	Mesorhizobium	464
PS4	Proteobacteria	Alphaproteobacteria	RCIZ01	464
OS2	Proteobacteria	Gammaproteobacteria	Pseudoxanthomonas	463
OS2	Proteobacteria	Gammaproteobacteria	MR-S7	460
OS2	Proteobacteria	Gammaproteobacteria	Hydrogenophaga	446
OS4	Bacteroidota	Bacteroidia	Flavobacterium	441
PS4	Bacteroidota	Bacteroidia	Sporocytophaga	430
BL6	Bacteroidota	Bacteroidia	Edaphocola	411
OS2	Proteobacteria	Gammaproteobacteria	Luteimonas	399
OS2	Bacteroidota	Bacteroidia	Pedobacter	398
OS4	Actinobacteriota	Actinomycetia	Cellulomonas	398
OS4	Verrucomicrobiota	Verrucomicrobiae	Opitutus	393
PS4	Proteobacteria	Gammaproteobacteria	Variovorax	390
BL6	Actinobacteriota	Actinomycetia	Cellulomonas	389
OS2	Proteobacteria	Gammaproteobacteria	Dokdonella	370
BL6	Actinobacteriota	Actinomycetia	Propionicimonas	357
PS4	Actinobacteriota	Actinomycetia	Mycobacterium	356
PS4	Actinobacteriota	Actinomycetia	NA	339
PS4	Proteobacteria	Alphaproteobacteria	Ga0077548	337
BL6	Proteobacteria	Gammaproteobacteria	Methyloversatilis	337
OS2	Verrucomicrobiota	Verrucomicrobiae	Terrimicrobium	333
BL6	Verrucomicrobiota	Verrucomicrobiae	Lacunisphaera	333
BL6	Firmicutes	Bacilli	NA	332
OS4	Proteobacteria	Gammaproteobacteria	UBA5868	321
BL6	Proteobacteria	Alphaproteobacteria	Afipia	287
PS4	Proteobacteria	Gammaproteobacteria	Pigmentiphaga	285
BL6	Firmicutes	Bacilli	Paenibacillus	284
PS4	Proteobacteria	Gammaproteobacteria	Dokdonella	277
OS2	Verrucomicrobiota	Verrucomicrobiae	EW11	270
OS2	Verrucomicrobiota	Verrucomicrobiae	Opi-474	261
OS4	Proteobacteria	Alphaproteobacteria	Rhizobium	254
BL6	Firmicutes	Bacilli	Paenibacillus_C	228
PS4	Actinobacteriota	Actinomycetia	Demequina	222
OS4	Myxococcota	Polyangia	NIC37A-2	220
PS4	Verrucomicrobiota	Verrucomicrobiae	Opi-474	213
OS4	Bacteroidota	Bacteroidia	46-32	205
OS2	Verrucomicrobiota	Verrucomicrobiae	ER46	198
OS4	Bacteroidota	Bacteroidia	Chitinophaga	194
OS2	Verrucomicrobiota	Verrucomicrobiae	NA	187
PS4	Proteobacteria	Alphaproteobacteria	Afipia	187
OS2	Proteobacteria	Alphaproteobacteria	Rhizobium	178
OS4	Proteobacteria	Gammaproteobacteria	Achromobacter	171
BL6	Firmicutes	Bacilli	Paenibacillus_G	169
OS4	Proteobacteria	Alphaproteobacteria	Terricaulis	165
PS4	Proteobacteria	Alphaproteobacteria	Rhizobium	161
BL6	Firmicutes	Bacilli	Paenibacillus_O	152
BL6	Proteobacteria	Alphaproteobacteria	Terricaulis	146
OS2	Myxococcota	Polyangia	NIC37A-2	144
OS2	Chlamydiota	Chlamydiia	Protochlamydia	143
OS2	Proteobacteria	Gammaproteobacteria	NA	140
OS4	Proteobacteria	Gammaproteobacteria	Aquabacterium_A	137
PS4	Planctomycetota	Planctomycetes	NA	136
OS4	Bacteroidota	Bacteroidia	Terrimonas	135
OS2	Actinobacteriota	Actinomycetia	Streptomyces	134
PS4	Actinobacteriota	Actinomycetia	Streptomyces	133
PS4	Cyanobacteria	Vampirovibrionia	QKMZ01	133
BL6	Proteobacteria	Alphaproteobacteria	NA	126
OS2	Actinobacteriota	Actinomycetia	Tomitella	121
BL6	Proteobacteria	Alphaproteobacteria	Rhizobium	119
OS2	Proteobacteria	Alphaproteobacteria	Agrobacterium	116
PS4	Proteobacteria	Gammaproteobacteria	NA	116
OS2	Proteobacteria	Alphaproteobacteria	VLJP01	112
PS4	Verrucomicrobiota	Verrucomicrobiae	ER46	111
OS2	Verrucomicrobiota	Verrucomicrobiae	Tous-C4FEB	109
OS4	Proteobacteria	Gammaproteobacteria	NA	108
OS2	Actinobacteriota	Actinomycetia	NA	104
OS2	Proteobacteria	Alphaproteobacteria	Sinorhizobium	98
PS4	Proteobacteria	Alphaproteobacteria	Allosphingosinicella	98
OS4	Proteobacteria	Alphaproteobacteria	NA	97
BL6	Proteobacteria	Alphaproteobacteria	ZC4RG25	97
PS4	Planctomycetota	Planctomycetes	Pirellula_B	90
OS2	Verrucomicrobiota	Verrucomicrobiae	CAIYUN01	89
OS4	Bacteroidota	Bacteroidia	NA	89
OS4	Marinisomatota	Marinisomatia	Marinisoma	89
OS2	Verrucomicrobiota	Verrucomicrobiae	CAITWF01	87
PS4	Proteobacteria	Alphaproteobacteria	NA	86
OS2	Proteobacteria	Alphaproteobacteria	Methylobacterium	79
BL6	Actinobacteriota	Actinomycetia	Protaetiibacter	77
BL6	Firmicutes	Bacilli	R196	77
OS4	Proteobacteria	Gammaproteobacteria	Methyloversatilis	74
PS4	Verrucomicrobiota	Verrucomicrobiae	Nibricoccus	74
OS2	Proteobacteria	Alphaproteobacteria	Bauldia	69
OS4	Proteobacteria	Alphaproteobacteria	Pararhizobium	69
PS4	Verrucomicrobiota	Kiritimatiellae	CAIYGI01	69
OS4	Proteobacteria	Alphaproteobacteria	Pseudohoeflea	68
OS2	Proteobacteria	Gammaproteobacteria	Pseudoxanthomonas_A	65
PS4	Actinobacteriota	Actinomycetia	Arachnia	65
PS4	Verrucomicrobiota	Verrucomicrobiae	Opitutus	65
BL6	Proteobacteria	Alphaproteobacteria	Phaeospirillum	64
BL6	Verrucomicrobiota	Verrucomicrobiae	Tous-C4FEB	64
PS4	Verrucomicrobiota	Verrucomicrobiae	Tous-C4FEB	63
OS2	Verrucomicrobiota	Verrucomicrobiae	Lacunisphaera	62
BL6	Verrucomicrobiota	Verrucomicrobiae	NA	62
PS4	Actinobacteriota	Actinomycetia	Microbacterium	60
OS2	Verrucomicrobiota	Verrucomicrobiae	UBA6669	58
BL6	Actinobacteriota	Actinomycetia	NA	58
OS2	Bacteroidota	Bacteroidia	NA	57
PS4	Proteobacteria	Alphaproteobacteria	Allorhizobium	57
OS2	Proteobacteria	Alphaproteobacteria	Mesorhizobium_A	56
OS2	Proteobacteria	Alphaproteobacteria	Bradyrhizobium	55
OS2	Proteobacteria	Gammaproteobacteria	Noviherbaspirillum	53
PS4	Proteobacteria	Gammaproteobacteria	Luminiphilus	53
BL6	Proteobacteria	Gammaproteobacteria	Pseudoxanthomonas	53
BL6	Proteobacteria	Alphaproteobacteria	Methylobacterium	52
OS4	Proteobacteria	Gammaproteobacteria	Xenophilus	51
PS4	Verrucomicrobiota	Verrucomicrobiae	Lacunisphaera	50
PS4	Actinobacteriota	Actinomycetia	UBA10799	47
OS2	Bacteroidota	Bacteroidia	Flavobacterium	46
OS2	Proteobacteria	NA	NA	44
OS2	Verrucomicrobiota	Verrucomicrobiae	IMCC26134_A	43
BL6	Verrucomicrobiota	Verrucomicrobiae	UBA6669	42
OS2	Bacteroidota	Bacteroidia	Prevotellamassilia	41
PS4	Verrucomicrobiota	Verrucomicrobiae	Geminisphaera	41
BL6	Firmicutes	Bacilli	Paenibacillus_S	40
OS2	Bacteroidota	Kapabacteria	UBA7675	39
OS2	Proteobacteria	Gammaproteobacteria	Pseudomonas_A	39
PS4	Proteobacteria	Alphaproteobacteria	Martelella	39
OS2	Proteobacteria	Gammaproteobacteria	Paraburkholderia	36
PS4	Planctomycetota	Planctomycetes	Rhodopirellula_B	36
BL6	Bacteroidota	Bacteroidia	Maribacter	36
BL6	Firmicutes	Bacilli	Paenibacillus_Z	36
OS2	Actinobacteriota	Actinomycetia	Nocardia	35
OS2	Proteobacteria	Alphaproteobacteria	Brevundimonas	35
OS2	Proteobacteria	Alphaproteobacteria	Terricaulis	35
PS4	Actinobacteriota	Actinomycetia	Rhodococcus	35
PS4	Verrucomicrobiota	Verrucomicrobiae	NA	34
PS4	Actinobacteriota	Actinomycetia	Gordonia	33
OS2	Bacteroidota	Bacteroidia	Filimonas	32
OS2	Firmicutes_B	Peptococcia	UBA3937	32
OS2	Verrucomicrobiota	Verrucomicrobiae	Palsa-1447	32
PS4	Actinobacteriota	Actinomycetia	Nocardia	32
PS4	Planctomycetota	Planctomycetes	Rhodopirellula	32
BL6	Bacteroidota	Bacteroidia	Dyadobacter	32
BL6	Proteobacteria	Alphaproteobacteria	Bradyrhizobium	32
OS2	Armatimonadota	Fimbriimonadia	Fimbriimonas	31
PS4	Proteobacteria	Alphaproteobacteria	AWTP1-13	31
PS4	Verrucomicrobiota	Verrucomicrobiae	CAITWF01	31
BL6	Firmicutes	Bacilli	Paenibacillus_M	31
OS2	Bacteroidota	Bacteroidia	Hymenobacter	30
OS4	Actinobacteriota	Actinomycetia	NA	30
OS4	Bacteroidota	Bacteroidia	Deminuibacter	30
PS4	Actinobacteriota	Actinomycetia	Corynebacterium	29
BL6	Proteobacteria	Gammaproteobacteria	UBA2250	29
BL6	Proteobacteria	Gammaproteobacteria	NA	29
OS2	Proteobacteria	Gammaproteobacteria	Pseudoduganella	27
OS2	Verrucomicrobiota	Verrucomicrobiae	UBA2377	27
OS2	Proteobacteria	Gammaproteobacteria	Limnohabitans_A	26
OS2	Proteobacteria	Gammaproteobacteria	ALPHA2B	25
OS2	Proteobacteria	Gammaproteobacteria	Duganella	25
OS4	Proteobacteria	Alphaproteobacteria	Mesorhizobium	25
OS2	Bacteroidota	Bacteroidia	Sediminibacterium	24
OS2	Proteobacteria	Alphaproteobacteria	Chelativorans	24
OS2	Verrucomicrobiota	Verrucomicrobiae	Ereboglobus	24
OS4	Bacteroidota	Bacteroidia	JJ008	24
PS4	Planctomycetota	Planctomycetes	GCA-2862225	24
BL6	Firmicutes	Bacilli	Paenibacillus_A	24
BL6	Firmicutes	Bacilli	Paenibacillus_E	24
BL6	Proteobacteria	Gammaproteobacteria	Klebsiella	24
BL6	Verrucomicrobiota	Verrucomicrobiae	Didemnitutus	24
OS2	Proteobacteria	Alphaproteobacteria	Ga0077548	23
OS2	Verrucomicrobiota	Verrucomicrobiae	Nibricoccus	23
OS4	Bacteroidota	Bacteroidia	Pseudobacter	23
PS4	Actinobacteriota	Actinomycetia	Bifidobacterium	23
BL6	Firmicutes	Bacilli	Paenibacillus_AB	23
OS2	Proteobacteria	Alphaproteobacteria	Ochrobactrum_A	22
BL6	Verrucomicrobiota	Verrucomicrobiae	CAIYUN01	22
OS2	Actinobacteriota	Actinomycetia	Microbacterium	21
OS2	Proteobacteria	Alphaproteobacteria	Neorhizobium	21
OS2	Proteobacteria	Alphaproteobacteria	Sphingomonas	21
OS4	Bacteroidota	Bacteroidia	Aquirufa	21
OS4	Proteobacteria	Alphaproteobacteria	Allorhizobium	21
PS4	Bacteroidota	Bacteroidia	Mucilaginibacter	21
BL6	Firmicutes_A	Clostridia	Lachnoclostridium	21
OS2	Myxococcota	Polyangia	Polyangium	20
OS2	Proteobacteria	Alphaproteobacteria	Caulobacter	20
OS2	Proteobacteria	Gammaproteobacteria	RBG-16-66-20	20
OS4	Proteobacteria	Gammaproteobacteria	Chelonobacter	20
PS4	Proteobacteria	Gammaproteobacteria	Jeongeupia	20
BL6	Proteobacteria	Alphaproteobacteria	Aureimonas	20
BL6	Proteobacteria	Alphaproteobacteria	Novosphingobium	20
OS2	Myxococcota	Polyangia	PMG-095	19
OS2	Verrucomicrobiota	Verrucomicrobiae	QYQL01	19
PS4	Actinobacteriota	Actinomycetia	Cellulomonas	19
PS4	Actinobacteriota	Actinomycetia	Rhodococcus_B	19
PS4	Proteobacteria	NA	NA	18
PS4	Actinobacteriota	Actinomycetia	Cryptosporangium	17
PS4	Proteobacteria	Gammaproteobacteria	Castellaniella	17
BL6	Proteobacteria	Alphaproteobacteria	Ga0077555	17
BL6	Verrucomicrobiota	Verrucomicrobiae	ER46	17
BL6	Verrucomicrobiota	Verrucomicrobiae	Nibricoccus	17
OS4	Bacteroidota	Bacteroidia	Sphingobacterium	16
PS4	Proteobacteria	Alphaproteobacteria	Aquamicrobium_A	16
PS4	Proteobacteria	Alphaproteobacteria	Sphingobium	16
BL6	Actinobacteriota	Actinomycetia	Nocardioides	16
BL6	Proteobacteria	NA	NA	16
OS2	Actinobacteriota	Actinomycetia	Oceanitalea	15
OS2	Proteobacteria	Gammaproteobacteria	Burkholderia	15
OS4	Bacteroidota	Bacteroidia	Chryseobacterium	15
OS4	Proteobacteria	Alphaproteobacteria	Neorhizobium	15
PS4	Actinobacteriota	Actinomycetia	Antricoccus	15
PS4	Bacteroidota	Bacteroidia	Pontibacter	15
PS4	Proteobacteria	Alphaproteobacteria	Pelagibacter	15
BL6	Firmicutes_A	Clostridia	Thermoclostridium_A	15
BL6	Proteobacteria	Alphaproteobacteria	Mycoplana	15
BL6	Proteobacteria	Gammaproteobacteria	Luteimonas	15
BL6	Proteobacteria	Gammaproteobacteria	Paraburkholderia	15
OS2	Actinobacteriota	Actinomycetia	Knoellia	14
OS2	Bacteroidota	Bacteroidia	46-32	14
OS2	Proteobacteria	Alphaproteobacteria	Cereibacter_A	14
OS2	Proteobacteria	Gammaproteobacteria	Pandoraea	14
OS2	Verrucomicrobiota	Verrucomicrobiae	Akkermansia	14
OS4	Desulfobacterota_E	MBNT15	CSP1-8	14
OS4	Proteobacteria	Alphaproteobacteria	Sphingobium	14
PS4	Actinobacteriota	Actinomycetia	Nocardioides	14
PS4	Bacteroidota	Bacteroidia	Hymenobacter	14
BL6	Actinobacteriota	Actinomycetia	Mycobacterium	14
BL6	Proteobacteria	Alphaproteobacteria	Allorhizobium	14
BL6	Proteobacteria	Alphaproteobacteria	Phenylobacterium	14
BL6	Verrucomicrobiota	Verrucomicrobiae	Rariglobus	14
OS2	Actinobacteriota	Actinomycetia	Actinotalea	13
OS4	Planctomycetota	PUPC01	JABMSA01	13
OS4	Proteobacteria	Alphaproteobacteria	Nitratireductor	13
PS4	Proteobacteria	Alphaproteobacteria	Mycoplana	13
PS4	Verrucomicrobiota	Verrucomicrobiae	CAIYUN01	13
BL6	Chlamydiota	Chlamydiia	JAAKFF01	13
BL6	Proteobacteria	Alphaproteobacteria	Rhodomicrobium	13
BL6	Proteobacteria	Alphaproteobacteria	Xanthobacter	13
BL6	Proteobacteria	Gammaproteobacteria	Cupriavidus	13
OS2	Myxococcota	Polyangia	NA	12
OS2	Proteobacteria	Alphaproteobacteria	Novosphingobium	12
OS2	Proteobacteria	Alphaproteobacteria	Youhaiella	12
OS4	Actinobacteriota	Actinomycetia	Streptomyces	12
OS4	Proteobacteria	Alphaproteobacteria	Brevundimonas	12
PS4	Actinobacteriota	Actinomycetia	Amycolatopsis	12
PS4	Actinobacteriota	Actinomycetia	Pauljensenia	12
PS4	Proteobacteria	Alphaproteobacteria	Devosia	12
PS4	Proteobacteria	Alphaproteobacteria	Parvibaculum	12
BL6	Proteobacteria	Alphaproteobacteria	DUSC01	12
OS2	Proteobacteria	Alphaproteobacteria	Amaricoccus	11
OS2	Proteobacteria	Alphaproteobacteria	Hansschlegelia	11
PS4	Proteobacteria	Alphaproteobacteria	Azospirillum	11
BL6	Firmicutes_A	Clostridia	Kineothrix	11
BL6	Planctomycetota	Planctomycetes	Planctomyces_A	11
BL6	Proteobacteria	Alphaproteobacteria	Starkeya	11
OS2	Bacteroidota	Bacteroidia	RC9	10
OS2	Proteobacteria	Alphaproteobacteria	Pelagibacter	10
OS2	Proteobacteria	Gammaproteobacteria	Rhodoferax	10
OS2	Verrucomicrobiota	Verrucomicrobiae	UBA967	10
OS4	Bacteroidota	Bacteroidia	Sporocytophaga	10
OS4	Bacteroidota	Bacteroidia	SYHX01	10
PS4	Actinobacteriota	Actinomycetia	Pseudoclavibacter	10
PS4	Actinobacteriota	Actinomycetia	SCUT-3	10
PS4	Proteobacteria	Gammaproteobacteria	MR-S7	10
BL6	Firmicutes_B	Desulfotomaculia	Sporotomaculum	10
BL6	Proteobacteria	Alphaproteobacteria	Mesorhizobium	10
OS2	Actinobacteriota	Actinomycetia	Demequina	9
OS2	Bacteroidota	NA	NA	9
OS2	Myxococcota	Polyangia	CAIVJW01	9
OS2	Proteobacteria	Alphaproteobacteria	Pelagibacterium	9
OS2	Proteobacteria	Gammaproteobacteria	Citrobacter	9
OS4	Bacteroidota	Bacteroidia	PNNG01	9
OS4	Proteobacteria	Gammaproteobacteria	Pseudoxanthomonas	9
PS4	Proteobacteria	Alphaproteobacteria	Hyphomicrobium	9
PS4	Proteobacteria	Alphaproteobacteria	Stappia	9
PS4	Proteobacteria	Gammaproteobacteria	Achromobacter	9
BL6	Firmicutes	Bacilli	Paenibacillus_D	9
BL6	Verrucomicrobiota	Verrucomicrobiae	CAITWF01	9
OS2	Bacteroidota	Bacteroidia	Elizabethkingia	8
OS2	Bacteroidota	Rhodothermia	SLJN01	8
OS2	Firmicutes	Bacilli	Anoxybacillus_A	8
OS2	Proteobacteria	Gammaproteobacteria	Pseudomonas_E	8
OS2	Verrucomicrobiota	Verrucomicrobiae	Geminisphaera	8
OS4	Proteobacteria	Gammaproteobacteria	Lysobacter	8
PS4	Actinobacteriota	Actinomycetia	Glutamicibacter	8
PS4	Actinobacteriota	Actinomycetia	Leifsonia	8
PS4	Actinobacteriota	Actinomycetia	Micromonospora	8
PS4	Actinobacteriota	Actinomycetia	Saccharopolyspora	8
PS4	Planctomycetota	Planctomycetes	Roseimaritima	8
BL6	Actinobacteriota	Actinomycetia	Streptomyces	8
BL6	Firmicutes	Bacilli	UBA4045	8
OS2	Bacteroidota	Bacteroidia	Sodaliphilus	7
OS2	Bacteroidota	Bacteroidia	UTBCD1	7
OS2	Myxococcota	Polyangia	Labilithrix	7
OS2	Proteobacteria	Alphaproteobacteria	Aureimonas_A	7
OS2	Proteobacteria	Alphaproteobacteria	Roseovarius	7
OS2	Proteobacteria	Alphaproteobacteria	STC3	7
OS2	Proteobacteria	Gammaproteobacteria	Acidovorax_A	7
OS2	Verrucomicrobiota	Verrucomicrobiae	JABDCI01	7
OS2	Verrucomicrobiota	Verrucomicrobiae	UBA6821	7
OS4	Bacteroidota	Bacteroidia	Ferruginibacter	7
OS4	Bacteroidota	Bacteroidia	VBAS01	7
OS4	Proteobacteria	Alphaproteobacteria	AG-337-I02	7
OS4	Proteobacteria	Gammaproteobacteria	Ramlibacter	7
PS4	Proteobacteria	Alphaproteobacteria	Sphingopyxis	7
BL6	Bacteroidota	Bacteroidia	Chryseobacterium	7
BL6	Proteobacteria	Alphaproteobacteria	Nitrobacter	7
OS2	Actinobacteriota	Actinomycetia	Rhodococcus	6
OS2	Bacteroidota	Bacteroidia	Aquimarina	6
OS2	Chloroflexota	Anaerolineae	DSQQ01	6
OS2	Chloroflexota	Anaerolineae	UBA5195	6
OS2	Proteobacteria	Alphaproteobacteria	Kaistia	6
OS2	Proteobacteria	Alphaproteobacteria	Wagnerdoeblera	6
OS2	Verrucomicrobiota	Verrucomicrobiae	CAIOZY01	6
OS4	Acidobacteriota	Vicinamibacteria	AA29	6
OS4	Proteobacteria	Alphaproteobacteria	STC3	6
PS4	Actinobacteriota	Actinomycetia	Actinokineospora	6
PS4	Actinobacteriota	Actinomycetia	Kineosphaera	6
PS4	Verrucomicrobiota	Verrucomicrobiae	Fen-1467	6
BL6	Bacteroidota	Bacteroidia	Runella	6
BL6	Firmicutes_A	Clostridia	Herbinix	6
BL6	Verrucomicrobiota	Verrucomicrobiae	IMCC26134_A	6
OS2	Bacteroidota	Bacteroidia	Edaphocola	5
OS2	Bacteroidota	Bacteroidia	Flavilitoribacter	5
OS2	Deinococcota	Deinococci	SKWV01	5
OS2	Firmicutes_A	Clostridia	HGW-1	5
OS2	Proteobacteria	Alphaproteobacteria	Allorhizobium	5
OS2	Proteobacteria	Alphaproteobacteria	Mesorhizobium_D	5
OS2	Proteobacteria	Alphaproteobacteria	Nitratireductor_C	5
OS2	Proteobacteria	Alphaproteobacteria	WTGU01	5
OS2	Proteobacteria	Gammaproteobacteria	Ralstonia	5
OS2	Proteobacteria	Gammaproteobacteria	Salinicola	5
OS2	Verrucomicrobiota	Verrucomicrobiae	CAIWX01	5
OS4	Proteobacteria	Gammaproteobacteria	Acidovorax	5
OS4	Proteobacteria	Gammaproteobacteria	Variovorax	5
PS4	Firmicutes_A	Clostridia	RUG13077	5
PS4	Planctomycetota	Planctomycetes	Crateriforma	5
PS4	Verrucomicrobiota	Verrucomicrobiae	Palsa-1447	5
PS4	Verrucomicrobiota	Verrucomicrobiae	Terrimicrobium	5
BL6	Proteobacteria	Alphaproteobacteria	Ferrovibrio	5
BL6	Proteobacteria	Alphaproteobacteria	Hyphomicrobium	5
OS2	Bacteroidota	Bacteroidia	Flavihumibacter	4
OS2	Bacteroidota	Bacteroidia	Niastella	4
OS2	Bacteroidota	Bacteroidia	TP-CH-4	4
OS2	Proteobacteria	Alphaproteobacteria	Nitratireductor	4
OS2	Proteobacteria	Alphaproteobacteria	Pseudaminobacter	4
OS2	Proteobacteria	Alphaproteobacteria	Xanthobacter	4
OS2	Proteobacteria	Gammaproteobacteria	Aquabacterium	4
OS2	Proteobacteria	Gammaproteobacteria	Pseudorhodoferax	4
OS4	Bacteroidota	Bacteroidia	Pedobacter	4
OS4	Proteobacteria	Gammaproteobacteria	Competibacter_A	4
PS4	Actinobacteriota	Actinomycetia	Arthrobacter_D	4
PS4	Actinobacteriota	Actinomycetia	Herbiconiux	4
PS4	Actinobacteriota	Actinomycetia	Subtercola	4
BL6	Bacteroidota	Bacteroidia	Epilithonimonas	4
BL6	Firmicutes_A	NA	NA	4
BL6	Proteobacteria	Alphaproteobacteria	Pelagerythrobacter	4
BL6	Proteobacteria	Alphaproteobacteria	Rhodobium	4
BL6	Proteobacteria	Gammaproteobacteria	Aromatoleum	4
BL6	Proteobacteria	Gammaproteobacteria	Bordetella_C	4
OS2	Actinobacteriota	Actinomycetia	Amycolatopsis	3
OS2	Actinobacteriota	Actinomycetia	Pseudonocardia	3
OS2	Firmicutes_A	Clostridia	Faecalibacterium	3
OS2	Myxococcota	Polyangia	GCA-2699025	3
OS2	Proteobacteria	Gammaproteobacteria	Arenicella	3
OS2	Proteobacteria	Gammaproteobacteria	Giesbergeria	3
PS4	Actinobacteriota	Actinomycetia	Pseudarthrobacter	3
PS4	Actinobacteriota	Actinomycetia	Spirillospora	3
PS4	Actinobacteriota	Actinomycetia	Yimella	3
PS4	Planctomycetota	Planctomycetes	Rhodopirellula_A	3
PS4	Planctomycetota	UBA8108	UBA12191	3
BL6	Planctomycetota	Planctomycetes	SIAJ01	3
BL6	Proteobacteria	Alphaproteobacteria	Hoeflea	3
BL6	Proteobacteria	Alphaproteobacteria	Roseovarius	3
BL6	Proteobacteria	Alphaproteobacteria	Sphingosinicella	3
BL6	Proteobacteria	Gammaproteobacteria	Pseudomonas_E	3
OS2	Actinobacteriota	Actinomycetia	Propionicimonas	2
OS2	Bacteroidota	Bacteroidia	Dyadobacter	2
OS2	Bacteroidota	Bacteroidia	RUG11857	2
OS2	Proteobacteria	Alphaproteobacteria	Aestuariivirga	2
OS2	Proteobacteria	Alphaproteobacteria	Mycoplana	2
OS2	Proteobacteria	Alphaproteobacteria	Paracoccus	2
OS2	Verrucomicrobiota	Verrucomicrobiae	Rariglobus	2
OS4	Proteobacteria	Gammaproteobacteria	Stenotrophomonas	2
PS4	Actinobacteriota	Actinomycetia	Arthrobacter_I	2
PS4	Actinobacteriota	Actinomycetia	CAIKAW01	2
PS4	Actinobacteriota	Actinomycetia	Chryseoglobus	2
PS4	Bacteroidota	Bacteroidia	CAILAF01	2
PS4	Planctomycetota	Planctomycetes	Bythopirellula	2
PS4	Proteobacteria	Alphaproteobacteria	Neorhizobium	2
PS4	Proteobacteria	Gammaproteobacteria	GCA-2730855	2
BL6	Bacteroidota	Bacteroidia	Flavobacterium	2
BL6	Bacteroidota	Bacteroidia	Pedobacter	2
BL6	Verrucomicrobiota	Verrucomicrobiae	Opi-474	2

## Sheet: Table S4
Table S4. Top overrepresented KEGGs from each consortium based on the GSEA
Consortium	KEGG_ko	GeneRatio	BgRatio	pvalue	p.adjust	qvalue	Count	names	path
OS2	K02035	0.00935039	751/131091	3.3749074495395724e-29	0	1.1162062322582458e-25	380	peptide/nickel	transport	system	substrate-binding	protein	Quorum	sensing
OS2	K02014	0.00802165	621/131091	6.967422848572641e-29	0	1.152191715274486e-25	326	iron	complex	outermembrane	recepter	protein	NA
OS2	K02031	0.00784941	732/131091	4.966346660674858e-13	0	6.317514659044699e-11	319	peptide/nickel	transport	system	ATP-binding	protein	Quorum	sensing
OS2	K02032	0.00772638	717/131091	3.6164656856985534e-13	0	5.0857620070979104e-11	314	peptide/nickel	transport	system	ATP-binding	protein	Quorum	sensing
OS2	K03406	0.00733268	803/131091	1.2498664329589377e-4	0.00197	0.0015367170152052365	298	methyl-accepting	chemotaxis	protein	Two-component	system
OS2	K06147	0.00676673	549/131091	8.670958616061818e-21	0	5.735610941403417e-18	275	ATP-binding	cassette,	subfamily	B,	bacterial	NA
OS2	K02529	0.00669291	735/131091	2.902063414547293e-4	0.00394	0.0030665153013309547	272	LacI	family	transcriptional	regulator	NA
OS2	K01999	0.00590551	519/131091	2.382964467327545e-13	0	3.6347196159605235e-11	240	branched-chain	amino	acid	transport	system	substrate-binding	protein	ABC	transporters
OS2	K02033	0.0054626	613/131091	0.0032497181419428316	0.02608	0.02031760899807855	222	peptide/nickel	transport	system	permease	protein	Quorum	sensing
OS2	K02027	0.00543799	602/131091	0.0015758912859837266	0.01477	0.011505635925550992	221	multiple	sugar	transport	system	substrate-binding	protein	NA
OS2	K01998	0.0050689	422/131091	1.6369974800548036e-14	0	3.1847963358094074e-12	206	branched-chain	amino	acid	transport	system	permease	protein	ABC	transporters
OS2	K01997	0.00435531	404/131091	4.011200264583268e-8	0	1.4906198972585014e-6	177	branched-chain	amino	acid	transport	system	permease	protein	ABC	transporters
OS2	K01995	0.0042815	400/131091	9.378139082508313e-8	0	2.9539962904502377e-6	174	branched-chain	amino	acid	transport	system	ATP-binding	protein	ABC	transporters
OS2	K02004	0.00403543	367/131091	2.467137788910862e-8	0	1.0328776725859998e-6	164	putative	ABC	transport	system	permease	protein	NA
OS2	K07497	0.00401083	443/131091	0.005284954216575914	0.03784	0.02947603825061067	163	putative	transposase	NA
OS2	K01652	0.00364173	273/131091	1.5720191408366044e-15	0	4.726587694266613e-13	148	acetolactate	synthase	I/II/III	large	subunit	[EC:2.2.1.6]	Valine,	leucine	and	isoleucine	biosynthesis
OS2	K02030	0.00359252	373/131091	5.06351451092813e-4	0.00613	0.004771198858400416	146	polar	amino	acid	transport	system	substrate-binding	protein	NA
OS2	K02051	0.00342028	342/131091	9.964098464340064e-5	0.00163	0.0012723916835991255	139	NitT/TauT	family	transport	system	substrate-binding	protein	NA
OS2	K01996	0.00342028	349/131091	2.8791957239185226e-4	0.00394	0.0030665153013309547	139	branched-chain	amino	acid	transport	system	ATP-binding	protein	ABC	transporters
OS2	K10440	0.00332185	319/131091	1.2886139333815896e-5	0.0003	2.333383543672629e-4	135	ribose	transport	system	permease	protein	ABC	transporters
OS4	K02035	0.00852394	751/131091	6.490407193777362e-21	0	1.089705207797357e-17	379	peptide/nickel	transport	system	substrate-binding	protein	Quorum	sensing
OS4	K02031	0.00816409	732/131091	1.5385288714349915e-18	0	1.7220726666237271e-15	363	peptide/nickel	transport	system	ATP-binding	protein	Quorum	sensing
OS4	K02032	0.00780424	717/131091	7.956568117935351e-16	0	5.343463641308162e-13	347	peptide/nickel	transport	system	ATP-binding	protein	Quorum	sensing
OS4	K02014	0.0074219	621/131091	5.645334738621853e-23	0	1.8956439806530224e-19	330	iron	complex	outermembrane	recepter	protein	NA
OS4	K06147	0.00573511	549/131091	8.03820373575874e-10	0	1.349572100898441e-7	255	ATP-binding	cassette,	subfamily	B,	bacterial	NA
OS4	K02033	0.00544273	613/131091	0.0022364728741300103	0.02455	0.01940527259207054	242	peptide/nickel	transport	system	permease	protein	Quorum	sensing
OS4	K02027	0.00528529	602/131091	0.0047727082040382425	0.04233	0.03345772809775188	235	multiple	sugar	transport	system	substrate-binding	protein	NA
OS4	K01999	0.00476801	519/131091	5.710205005214966e-4	0.00895	0.007075375399741986	212	branched-chain	amino	acid	transport	system	substrate-binding	protein	ABC	transporters
OS4	K07497	0.00465556	443/131091	1.619876884242377e-8	0	1.5109377955360183e-6	207	putative	transposase	NA
OS4	K00799	0.00443065	483/131091	9.446520382953616e-4	0.01299	0.010265508438638063	197	glutathione	S-transferase	[EC:2.5.1.18]	Glutathione	metabolism
OS4	K01998	0.00393586	422/131091	7.201868496364321e-4	0.0107	0.008455635076703048	175	branched-chain	amino	acid	transport	system	permease	protein	ABC	transporters
OS4	K02004	0.00377842	367/131091	1.6466453160808966e-6	9e-05	7.372348853751663e-5	168	putative	ABC	transport	system	permease	protein	NA
OS4	K01652	0.00332861	273/131091	4.753219047476495e-12	0	1.5960809222578967e-9	148	acetolactate	synthase	I/II/III	large	subunit	[EC:2.2.1.6]	Valine,	leucine	and	isoleucine	biosynthesis
OS4	K02051	0.00328363	342/131091	4.477397432782582e-4	0.00734	0.005804876167679917	146	NitT/TauT	family	transport	system	substrate-binding	protein	NA
OS4	K00626	0.00305872	283/131091	6.198015342425469e-7	4e-05	3.527505609694424e-5	136	acetyl-CoA	C-acetyltransferase	[EC:2.3.1.9]	Fatty	acid	degradation
OS4	K00128	0.00301374	244/131091	1.401337201730972e-11	0	3.921285678527895e-9	134	aldehyde	dehydrogenase	(NAD+)	[EC:1.2.1.3]	Glycolysis	/	Gluconeogenesis
OS4	K10112	0.00299125	306/131091	3.2145437426332285e-4	0.00571	0.004516359629597004	133	multiple	sugar	transport	system	ATP-binding	protein	[EC:7.5.2.-]	ABC	transporters
OS4	K12132	0.00296876	293/131091	4.982562117375259e-5	0.00137	0.0010864233188261842	132	eukaryotic-like	serine/threonine-protein	kinase	[EC:2.7.11.1]	NA
OS4	K02057	0.00290129	301/131091	7.662251403881201e-4	0.01126	0.008902779813651805	129	simple	sugar	transport	system	permease	protein	NA
OS4	K01179	0.00281133	287/131091	4.300565082876486e-4	0.00714	0.005640955022358549	125	endoglucanase	[EC:3.2.1.4]	Starch	and	sucrose	metabolism
PS4	K03088	0.00939346	1035/131091	4.083294950666899e-5	9.9e-4	7.929234513415879e-4	372	RNA	polymerase	sigma-70	factor,	ECF	subfamily	NA
PS4	K02035	0.00926721	751/131091	6.147562850827909e-27	0	1.0347318945761925e-23	367	peptide/nickel	transport	system	substrate-binding	protein	Quorum	sensing
PS4	K02031	0.00780264	732/131091	3.713024641130604e-12	0	8.928009625816297e-10	309	peptide/nickel	transport	system	ATP-binding	protein	Quorum	sensing
PS4	K02032	0.00742387	717/131091	5.096825734229623e-10	0	6.863009978133194e-8	294	peptide/nickel	transport	system	ATP-binding	protein	Quorum	sensing
PS4	K02014	0.00712085	621/131091	1.0003916147774525e-15	0	4.810905840689163e-13	282	iron	complex	outermembrane	recepter	protein	NA
PS4	K06147	0.00643907	549/131091	8.747060252487753e-16	0	4.810905840689163e-13	255	ATP-binding	cassette,	subfamily	B,	bacterial	NA
PS4	K02027	0.0061613	602/131091	4.5037995884406904e-8	0	2.5268686111988296e-6	244	multiple	sugar	transport	system	substrate-binding	protein	NA
PS4	K02026	0.0060098	606/131091	1.1881930286566346e-6	5e-05	3.999832953309387e-5	238	multiple	sugar	transport	system	permease	protein	NA
PS4	K01990	0.00585829	601/131091	6.678316442636567e-6	2.1e-4	1.703130461208273e-4	232	ABC-2	type	transport	system	ATP-binding	protein	NA
PS4	K02033	0.00583304	613/131091	4.407394635608961e-5	0.00104	8.320230125793018e-4	231	peptide/nickel	transport	system	permease	protein	Quorum	sensing
PS4	K01999	0.00568153	519/131091	1.6236680178976277e-10	0	2.6027520407201076e-8	225	branched-chain	amino	acid	transport	system	substrate-binding	protein	ABC	transporters
PS4	K02025	0.00558053	544/131091	1.5117529252405211e-7	1e-05	7.068107975028051e-6	221	multiple	sugar	transport	system	permease	protein	NA
PS4	K01992	0.00510075	551/131091	6.707310307787134e-4	0.0091	0.007283524062581751	202	ABC-2	type	transport	system	permease	protein	NA
PS4	K02034	0.00472198	496/131091	2.1093040271746082e-4	0.00362	0.002898197327134005	187	peptide/nickel	transport	system	permease	protein	Quorum	sensing
PS4	K01998	0.00467148	422/131091	2.262229922148489e-9	0	2.1758229446709383e-7	185	branched-chain	amino	acid	transport	system	permease	protein	ABC	transporters
PS4	K02004	0.00416646	367/131091	1.7984300999973733e-9	0	1.8345708005714833e-7	165	putative	ABC	transport	system	permease	protein	NA
PS4	K01997	0.0040907	404/131091	1.4581503714568901e-5	4.1e-4	3.250724913153806e-4	162	branched-chain	amino	acid	transport	system	permease	protein	ABC	transporters
PS4	K01995	0.00383819	400/131091	5.16131543593126e-4	0.00751	0.006011978424370123	152	branched-chain	amino	acid	transport	system	ATP-binding	protein	ABC	transporters
PS4	K02051	0.00363618	342/131091	2.0458583071886696e-6	8e-05	6.497174643882191e-5	144	NitT/TauT	family	transport	system	substrate-binding	protein	NA
PS4	K02049	0.00348467	354/131091	2.6207051436507564e-4	0.0043	0.003446141056494704	138	NitT/TauT	family	transport	system	ATP-binding	protein	NA
BL6	K03406	0.00856683	803/131091	4.264190757131389e-19	0	1.851556512964945e-16	436	methyl-accepting	chemotaxis	protein	Two-component	system
BL6	K02035	0.00783982	751/131091	1.2463498167642991e-15	0	3.3303274456050095e-13	399	peptide/nickel	transport	system	substrate-binding	protein	Quorum	sensing
BL6	K02031	0.00740755	732/131091	2.157506072606993e-12	0	3.9444709360681873e-10	377	peptide/nickel	transport	system	ATP-binding	protein	Quorum	sensing
BL6	K02032	0.00715212	717/131091	5.321556792257922e-11	0	6.561738182655187e-9	364	peptide/nickel	transport	system	ATP-binding	protein	Quorum	sensing
BL6	K17318	0.00709317	381/131091	1.2738517996532406e-120	0	4.424958883005993e-117	361	putative	aldouronate	transport	system	substrate-binding	protein	ABC	transporters
BL6	K02027	0.00691634	602/131091	1.3605514768955475e-22	0	7.723870620325718e-20	352	multiple	sugar	transport	system	substrate-binding	protein	NA
BL6	K02014	0.00683774	621/131091	2.713924042227177e-18	0	1.0474794548946998e-15	348	iron	complex	outermembrane	recepter	protein	NA
BL6	K02529	0.00658231	735/131091	1.0770117788110628e-4	0.00226	0.0018382225816851198	335	LacI	family	transcriptional	regulator	NA
BL6	K06147	0.00640547	549/131091	1.5564769583383643e-22	0	7.723870620325718e-20	326	ATP-binding	cassette,	subfamily	B,	bacterial	NA
BL6	K17320	0.00630723	351/131091	7.3551261569139284e-96	0	1.2774692798850508e-92	321	putative	aldouronate	transport	system	permease	protein	ABC	transporters
BL6	K02026	0.00607144	606/131091	7.774937793658457e-10	0	7.943434897545791e-8	309	multiple	sugar	transport	system	permease	protein	NA
BL6	K17319	0.0060125	333/131091	8.057185339724782e-93	0	9.329372498628694e-90	306	putative	aldouronate	transport	system	permease	protein	ABC	transporters
BL6	K01990	0.00581601	601/131091	1.2681110305578634e-7	1e-05	7.341695440071842e-6	296	ABC-2	type	transport	system	ATP-binding	protein	NA
BL6	K01992	0.00569812	551/131091	3.3362537900003997e-11	0	4.457343120243449e-9	290	ABC-2	type	transport	system	permease	protein	NA
BL6	K02025	0.00556058	544/131091	2.827436487821995e-10	0	3.168264994842982e-8	283	multiple	sugar	transport	system	permease	protein	NA
BL6	K02033	0.00542304	613/131091	9.88699125536134e-4	0.01323	0.010766233671899826	276	peptide/nickel	transport	system	permease	protein	Quorum	sensing
BL6	K01999	0.00514795	519/131091	4.460560810112701e-8	0	3.098915931236192e-6	262	branched-chain	amino	acid	transport	system	substrate-binding	protein	ABC	transporters
BL6	K07720	0.00481393	269/131091	1.439662662282725e-72	0	1.0001866916911563e-69	245	two-component	system,	response	regulator	YesN	Two-component	system
BL6	K02016	0.00465674	430/131091	5.6487899873102075e-12	0	9.81105629374931e-10	237	iron	complex	transport	system	substrate-binding	protein	NA
BL6	K07718	0.00442095	232/131091	5.628555164455747e-82	0	4.8879558007115703e-79	225	two-component	system,	sensor	histidine	kinase	YesM	[EC:2.7.13.3]	Two-component	system

## Sheet: Table S5
Table S5. KEGGS with the maximum taxonomic unevenness between cellulolytic consortia. Taxonomy of the certain KEGG is attributed to the phylotype with maximum contribution to this KEGG category.
KO - number of KEGGs of this taxon in the category. CV - coefficient of variation. SD - standart deviation. InvSimpson - value of Inverted Simpson index
community	Phylum	Class	Family	Genus	KEGG_ko	KO	OS4	PS4	BL6	cv	sd	invsimpson
BL6	Firmicutes	Bacilli	Paenibacillaceae	Cohnella	K07718	102	1	21	211	1.4923	115.902	3.09547
BL6	Firmicutes	Bacilli	Paenibacillaceae	Cohnella	K17318	138	8	28	339	1.48479	185.599	4.34766
BL6	Firmicutes	Bacilli	Paenibacillaceae	Cohnella	K17320	133	5	29	313	1.48112	171.316	4.03935
BL6	Firmicutes	Bacilli	Paenibacillaceae	Cohnella	K17319	128	5	29	295	1.46764	160.951	3.91058
BL6	Firmicutes	Bacilli	Paenibacillaceae	Cohnella	K07720	109	1	29	239	1.45073	130.082	3.2435
BL6	Firmicutes	Bacilli	Paenibacillaceae	Cohnella	K10117	35	16	22	86	0.938676	38.7986	7.07268
BL6	Firmicutes	Bacilli	Paenibacillaceae	Cohnella	K10118	30	20	27	78	0.759832	31.6596	7.99233
OS4	Bacteroidota	Bacteroidia	Chitinophagaceae	Chitinophaga	K21572	24	55	28	12	0.686313	21.7332	6.26301
BL6	Firmicutes	Bacilli	Paenibacillaceae	Cohnella	K15771	10	11	12	30	0.605246	10.6927	8.43544
BL6	Proteobacteria	Alphaproteobacteria	Beijerinckiaceae	Bosea	K01473	9	16	12	26	0.400617	7.2111	8.19101
OS4	Proteobacteria	Gammaproteobacteria	Xanthomonadaceae	Pseudoxanthomonas_A	K21449	17	43	28	21	0.366516	11.2398	4.61002
PS4	Proteobacteria	Alphaproteobacteria	Caulobacteraceae	Asticcacaulis	K14266	21	31	33	16	0.348434	9.29157	4.5584
BL6	Proteobacteria	Alphaproteobacteria	Devosiaceae	Devosia_A	K00064	9	14	16	25	0.319607	5.85947	6.2115
OS4	Proteobacteria	Alphaproteobacteria	Devosiaceae	Devosia	K01684	9	18	13	24	0.300413	5.50757	6.98614
OS4	Proteobacteria	Alphaproteobacteria	Devosiaceae	Devosia	K10823	12	33	18	31	0.297971	8.14453	9.77326
BL6	Proteobacteria	Alphaproteobacteria	Beijerinckiaceae	Bosea	K02028	23	60	48	81	0.265132	16.7033	7.7402
OS4	Proteobacteria	Alphaproteobacteria	Devosiaceae	Devosia	K02058	14	45	27	34	0.256805	9.07377	9.10535
BL6	Proteobacteria	Alphaproteobacteria	Xanthobacteraceae	Afipia	K03520	10	12	20	19	0.256406	4.3589	7.7181
OS4	Proteobacteria	Alphaproteobacteria	Devosiaceae	Devosia	K10111	22	46	29	33	0.246894	8.88819	4.71463
OS4	Proteobacteria	Alphaproteobacteria	Devosiaceae	Devosia	K09969	9	29	18	28	0.243311	6.08276	7.18391
OS4	Proteobacteria	Alphaproteobacteria	Devosiaceae	Devosia	K02032	71	217	136	214	0.242983	45.9239	9.53266
OS4	Proteobacteria	Alphaproteobacteria	Devosiaceae	Devosia	K07746	8	28	20	18	0.240523	5.2915	6.66055
OS4	Proteobacteria	Alphaproteobacteria	Devosiaceae	Devosia	K02031	74	221	144	218	0.224438	43.6157	9.4233
BL6	Proteobacteria	Alphaproteobacteria	Devosiaceae	Devosia_A	K16079	19	31	46	47	0.216844	8.96289	6.00625
OS4	Proteobacteria	Alphaproteobacteria	Devosiaceae	Devosia	K13896	19	56	37	49	0.203008	9.60902	8.30478
BL6	Proteobacteria	Alphaproteobacteria	Devosiaceae	Devosia_A	K07232	8	16	16	22	0.19245	3.4641	5.97541
BL6	Proteobacteria	Alphaproteobacteria	Beijerinckiaceae	Bosea	K02029	33	83	85	115	0.190026	17.9258	8.66858
OS4	Proteobacteria	Alphaproteobacteria	Devosiaceae	Devosia	K18893	9	24	19	17	0.180278	3.60555	8.82353
OS4	Proteobacteria	Alphaproteobacteria	Rhizobiaceae	Shinella	K02055	16	49	39	56	0.178	8.544	7.8486
PS4	Proteobacteria	Alphaproteobacteria	Devosiaceae	Devosia_A	K03534	7	17	21	15	0.172927	3.05505	7.57143
OS4	Proteobacteria	Alphaproteobacteria	Devosiaceae	Devosia	K02033	51	156	137	188	0.160757	25.7747	9.12559
OS4	Proteobacteria	Alphaproteobacteria	Devosiaceae	Devosia	K00117	8	20	15	18	0.14245	2.51661	8.59021
BL6	Proteobacteria	Alphaproteobacteria	Devosiaceae	Devosia_A	K01486	6	18	15	20	0.14245	2.51661	8.23754
OS4	Proteobacteria	Alphaproteobacteria	Devosiaceae	Devosia	K02035	71	208	165	217	0.14131	27.7909	8.82965
OS4	Proteobacteria	Alphaproteobacteria	Devosiaceae	Devosia	K08151	8	22	17	18	0.13925	2.64575	7.23608
OS4	Proteobacteria	Alphaproteobacteria	Devosiaceae	Devosia	K01686	9	22	19	25	0.136364	3	7.09446
OS4	Proteobacteria	Alphaproteobacteria	Devosiaceae	Devosia	K15270	15	43	35	34	0.132131	4.93288	7.33567
OS4	Proteobacteria	Alphaproteobacteria	Devosiaceae	Devosia	K05813	8	20	19	24	0.125988	2.64575	9.25175
OS4	Proteobacteria	Alphaproteobacteria	Devosiaceae	Devosia	K10112	36	89	72	73	0.1223	9.53939	7.78226
OS4	Proteobacteria	Alphaproteobacteria	Rhizobiaceae	Shinella	K09972	8	25	20	23	0.111027	2.51661	7.20249
OS4	Proteobacteria	Alphaproteobacteria	Rhizobiaceae	Shinella	K02054	15	39	33	41	0.110531	4.16333	9.38207
OS4	Proteobacteria	Alphaproteobacteria	Rhizobiaceae	Shinella	K02053	12	44	36	43	0.106315	4.3589	9.93368
OS4	Proteobacteria	Alphaproteobacteria	Devosiaceae	Devosia	K07716	11	27	22	25	0.102025	2.51661	9.12667
BL6	Proteobacteria	Alphaproteobacteria	Devosiaceae	Devosia	K02034	42	120	121	141	0.0930333	11.8462	9.52258
OS4	Proteobacteria	Alphaproteobacteria	Devosiaceae	Devosia	K13892	12	28	32	33	0.0853468	2.64575	7.85559
OS4	Proteobacteria	Alphaproteobacteria	Devosiaceae	Devosia	K10441	16	55	53	47	0.0805806	4.16333	9.33735
BL6	Proteobacteria	Alphaproteobacteria	Rhizobiaceae	Shinella	K10440	28	76	76	77	0.00756354	0.57735	8.40805
